# Supplementary material for: FUT3-B3GNT3 Interaction Promotes Pancreatic Cancer Progression and Chemoresistance via NF-κB signaling Mediated Autophagy
Source: Research Square preprint supplement (doi:10.21203/rs.3.rs-7518425/v1), 2025-09-22

All WB clip images used in the article are marked with red boxes in the original images.

SDS-PAGE gel image showing protein bands across 10 lanes. Molecular weight markers are indicated on the left: 180KDa, 130KDa, 100KDa, 70KDa, 55KDa, 40KDa, 35KDa, 25KDa, 15KDa, and 10KDa. A red box highlights a band at approximately 55KDa in lanes 7, 8, and 9.

# Beclin1

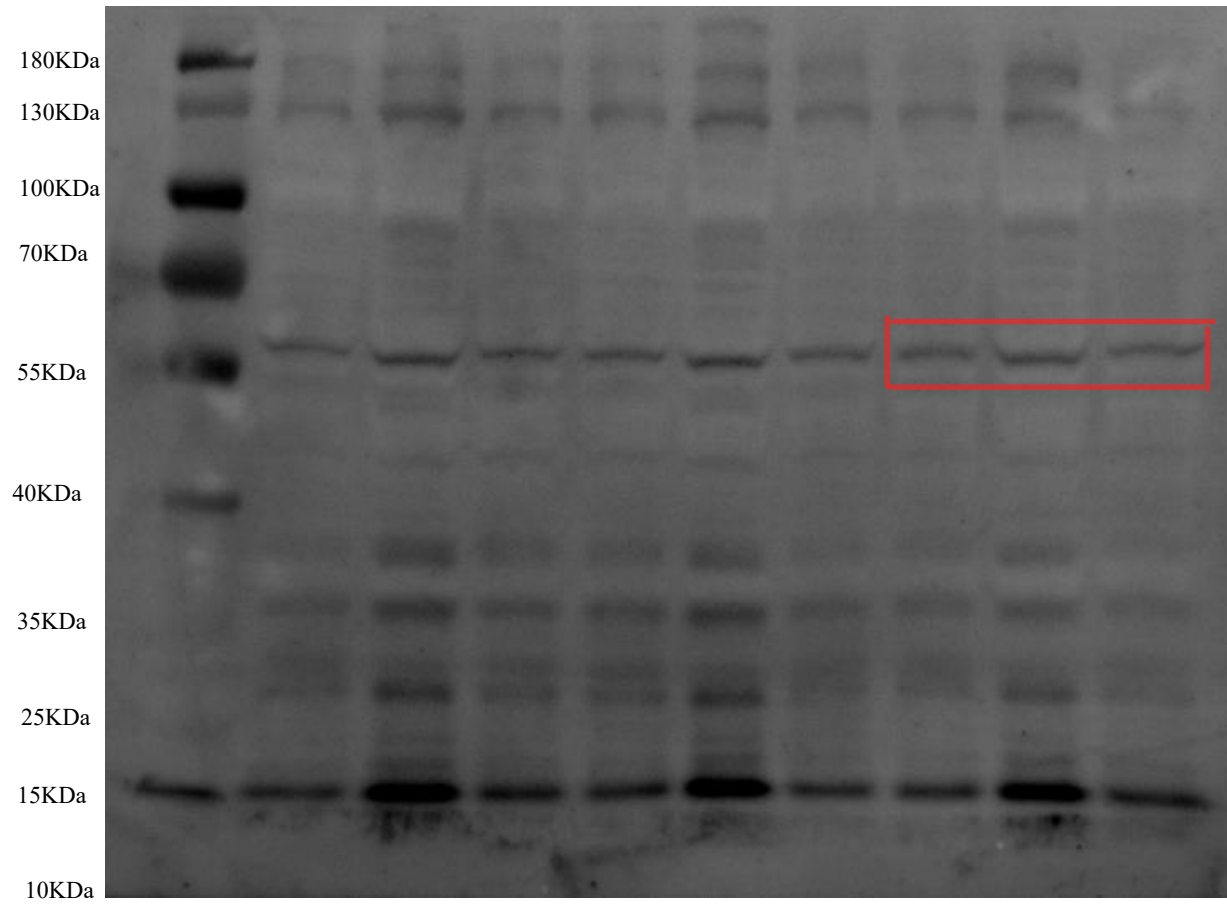

# FUT3

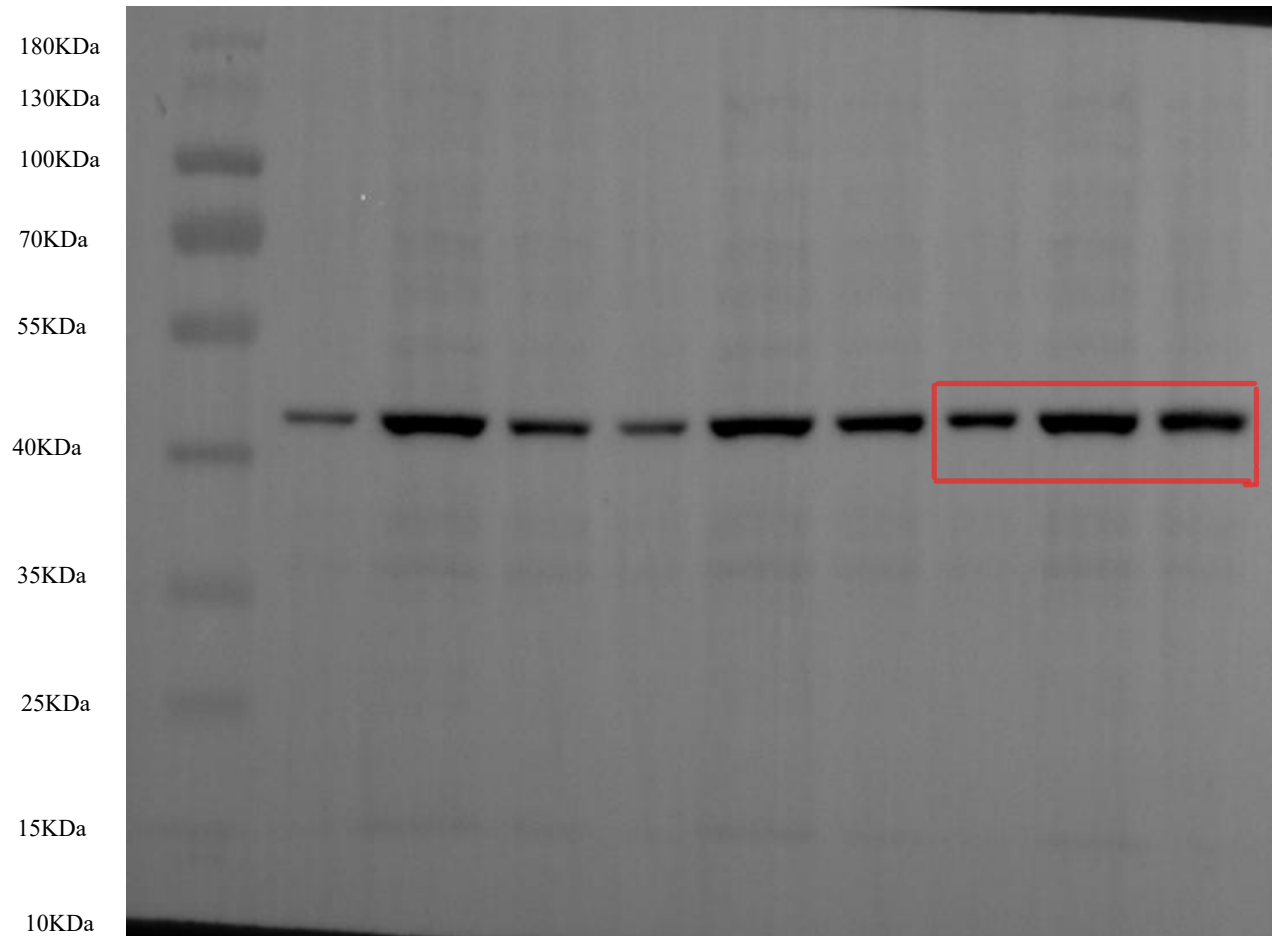

000000

# GAPDH

180KDa  
130KDa  
100KDa  
70KDa  
55KDa  
40KDa  
35KDa  
25KDa  
15KDa  
10KDa

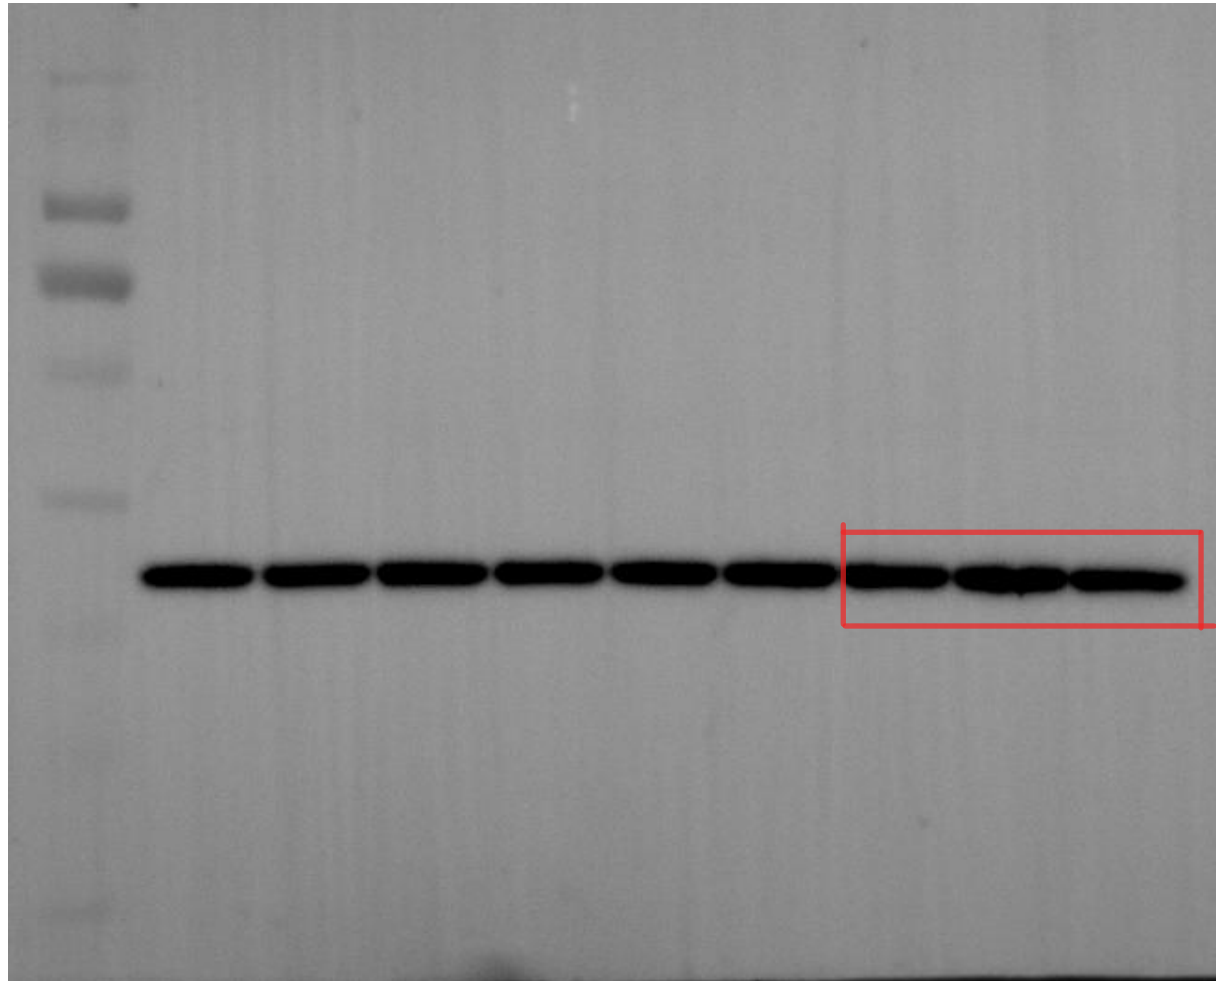

fig 2 G,I WB

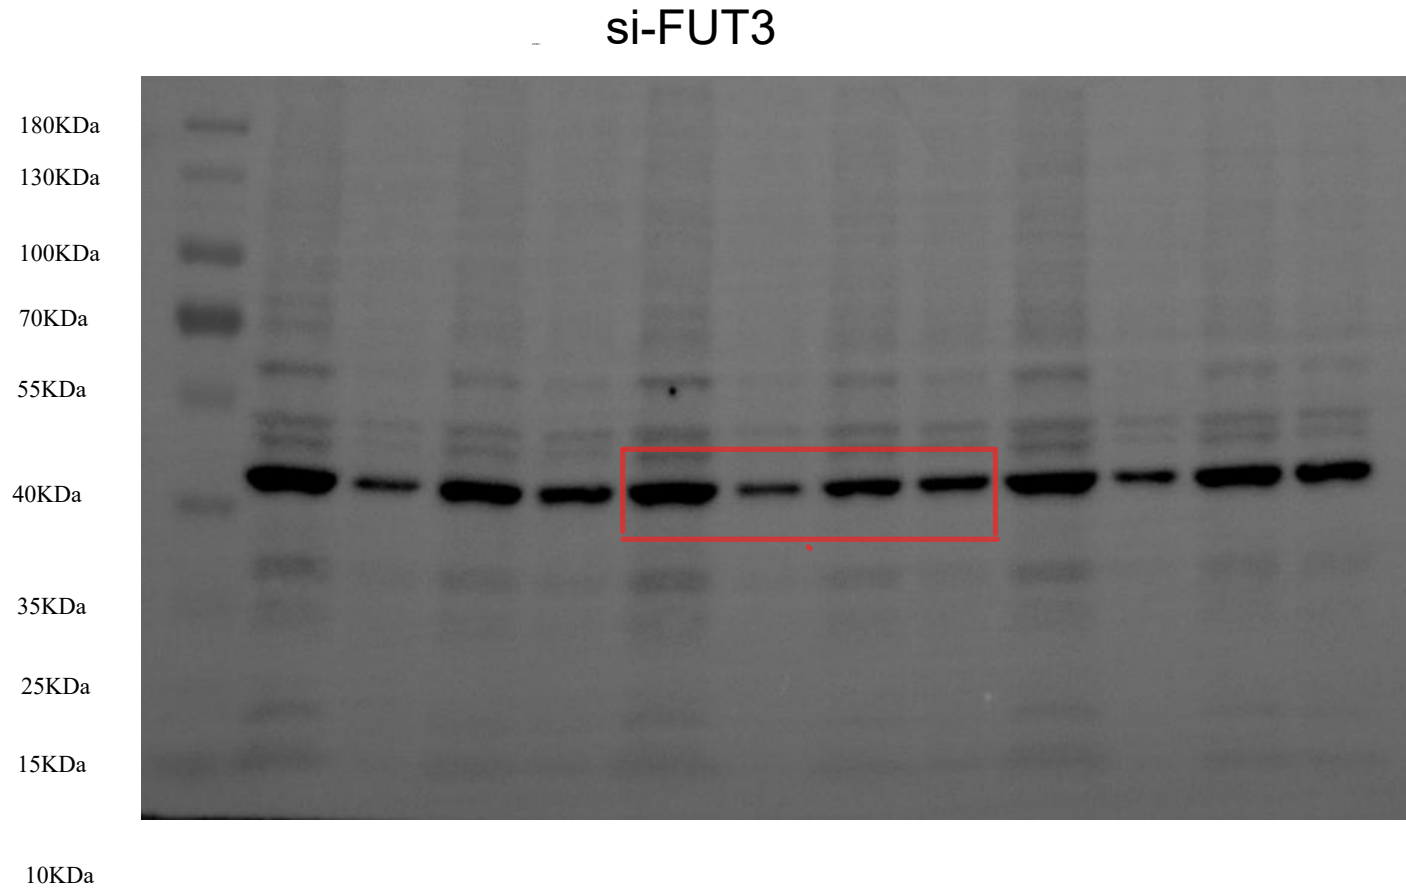

# GAPDH

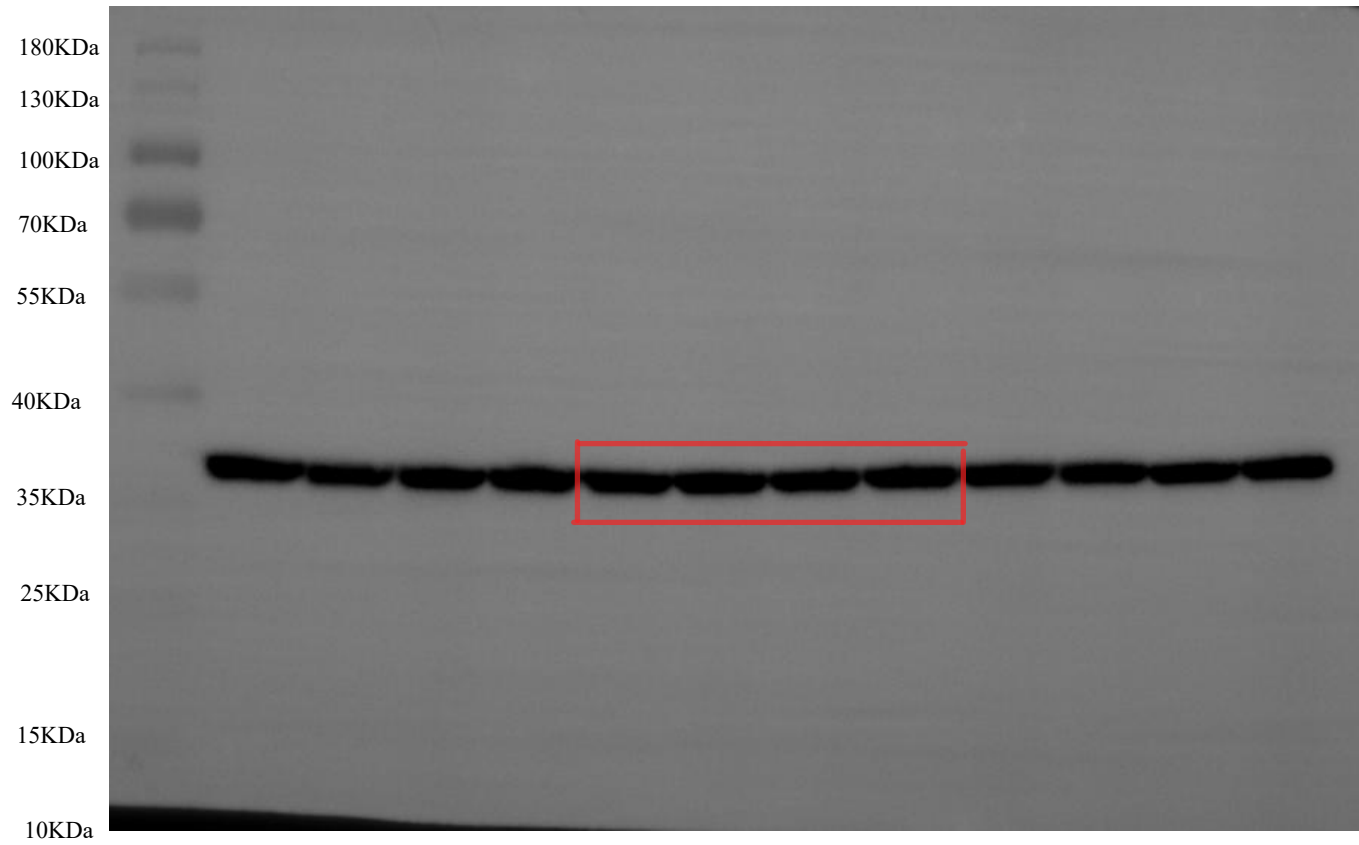

oe-FUT3

180KDa  
130KDa  
100KDa  
70KDa  
55KDa  
40KDa  
35KDa  
25KDa  
15KDa  
10KDa

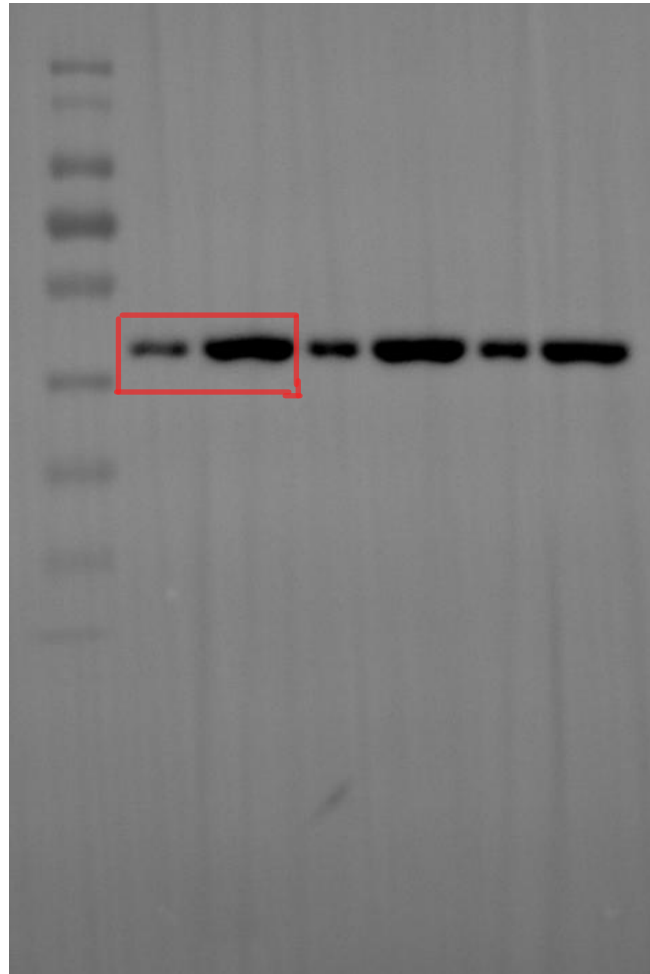



# GAPDH

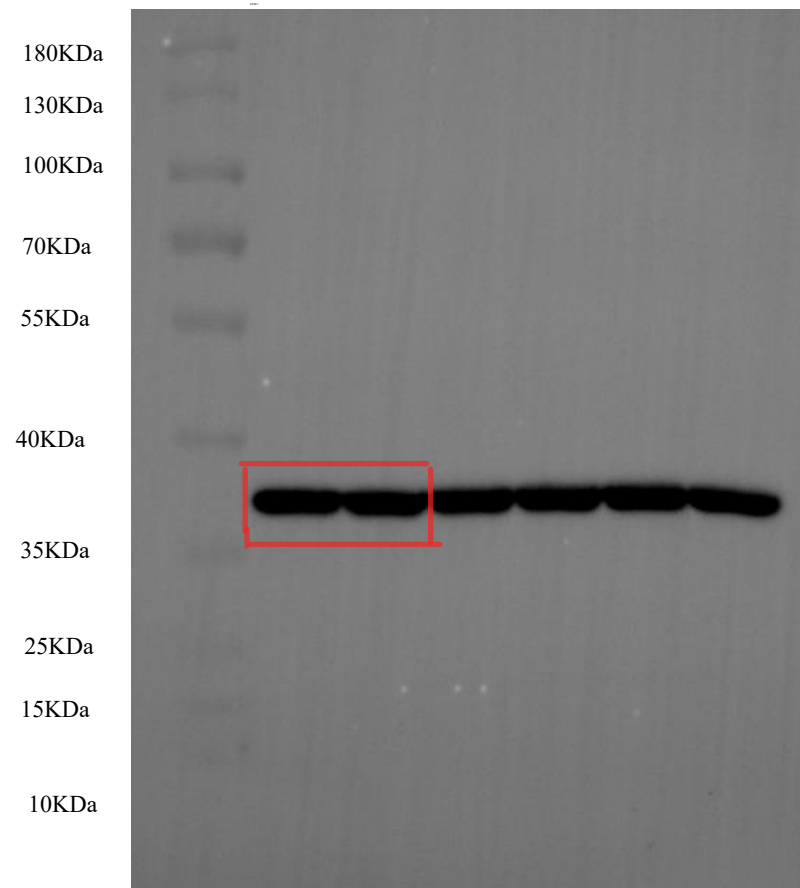

fig 4 E CO-IP

FUT3

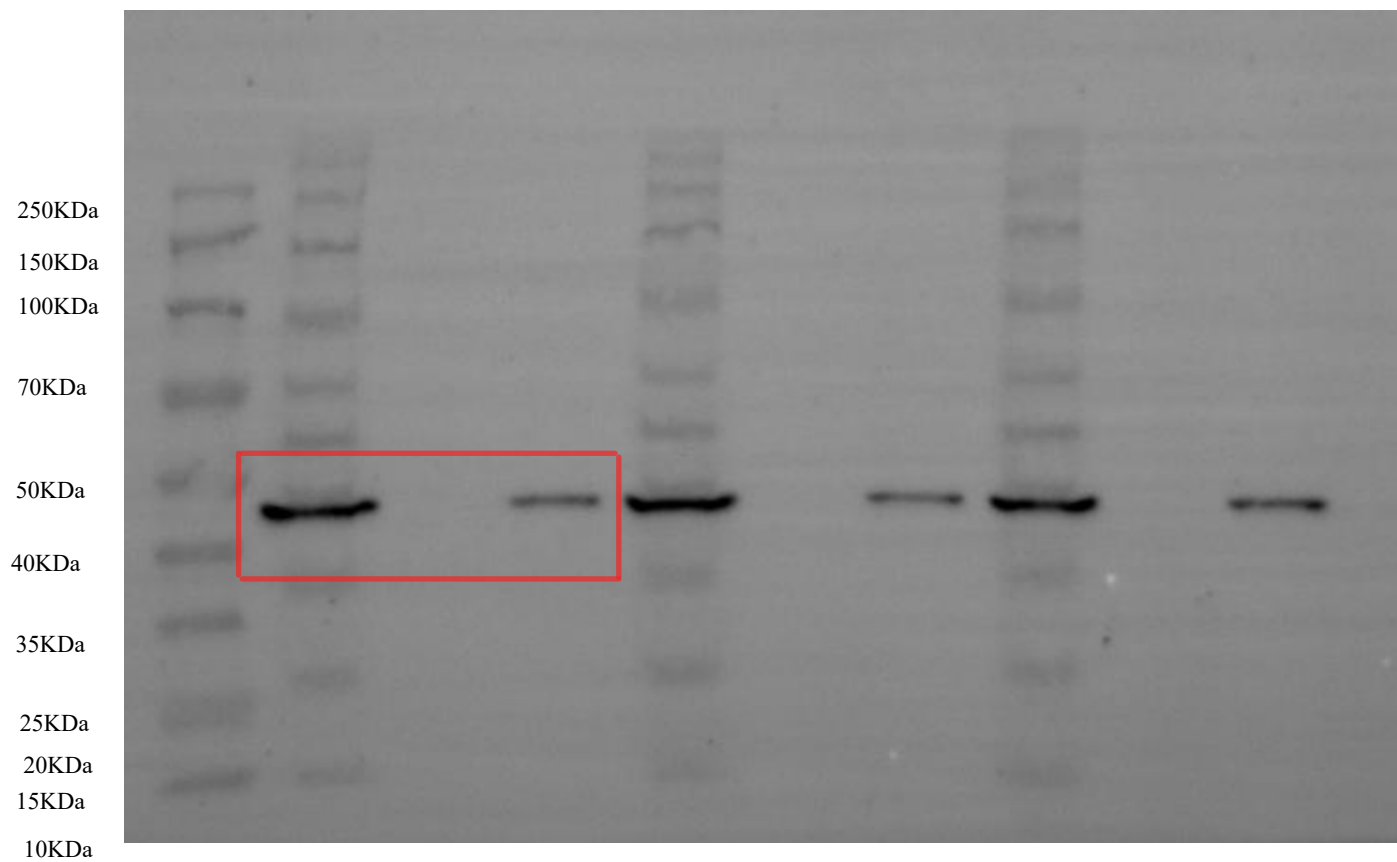

## B3GNT3

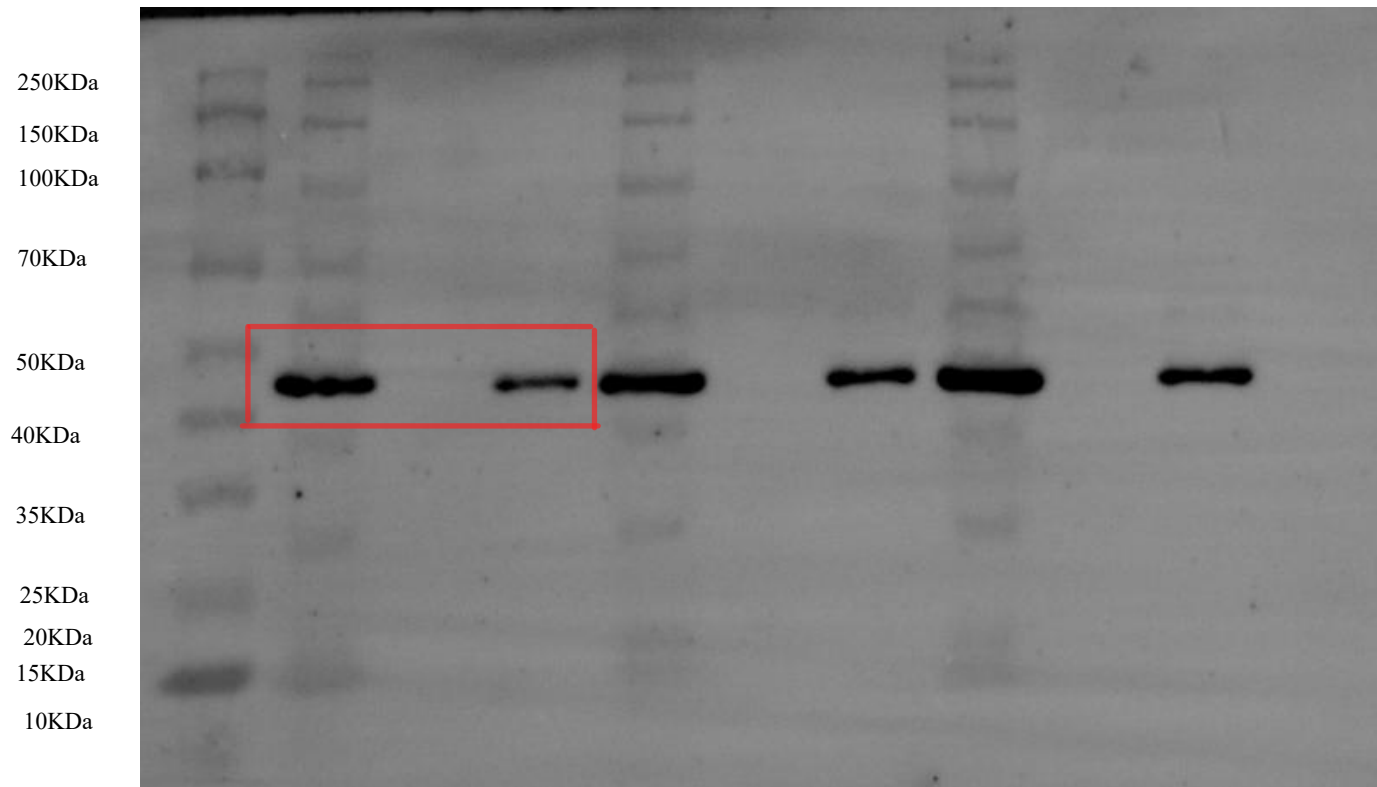

fig 5C WB

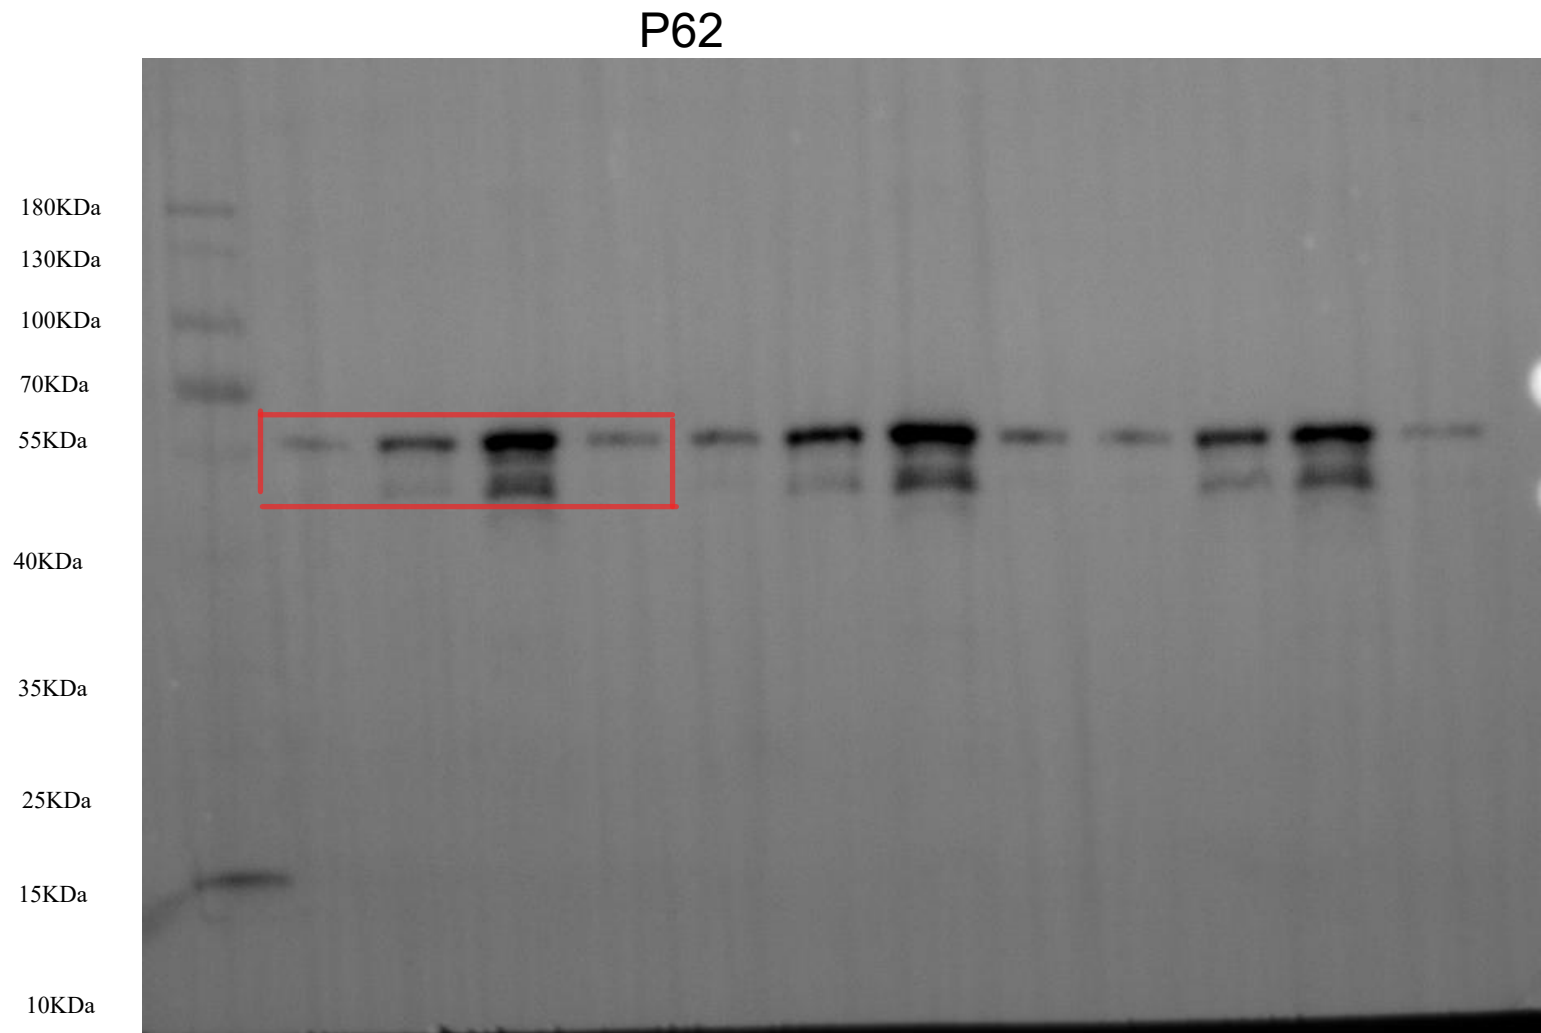

## Beclin1

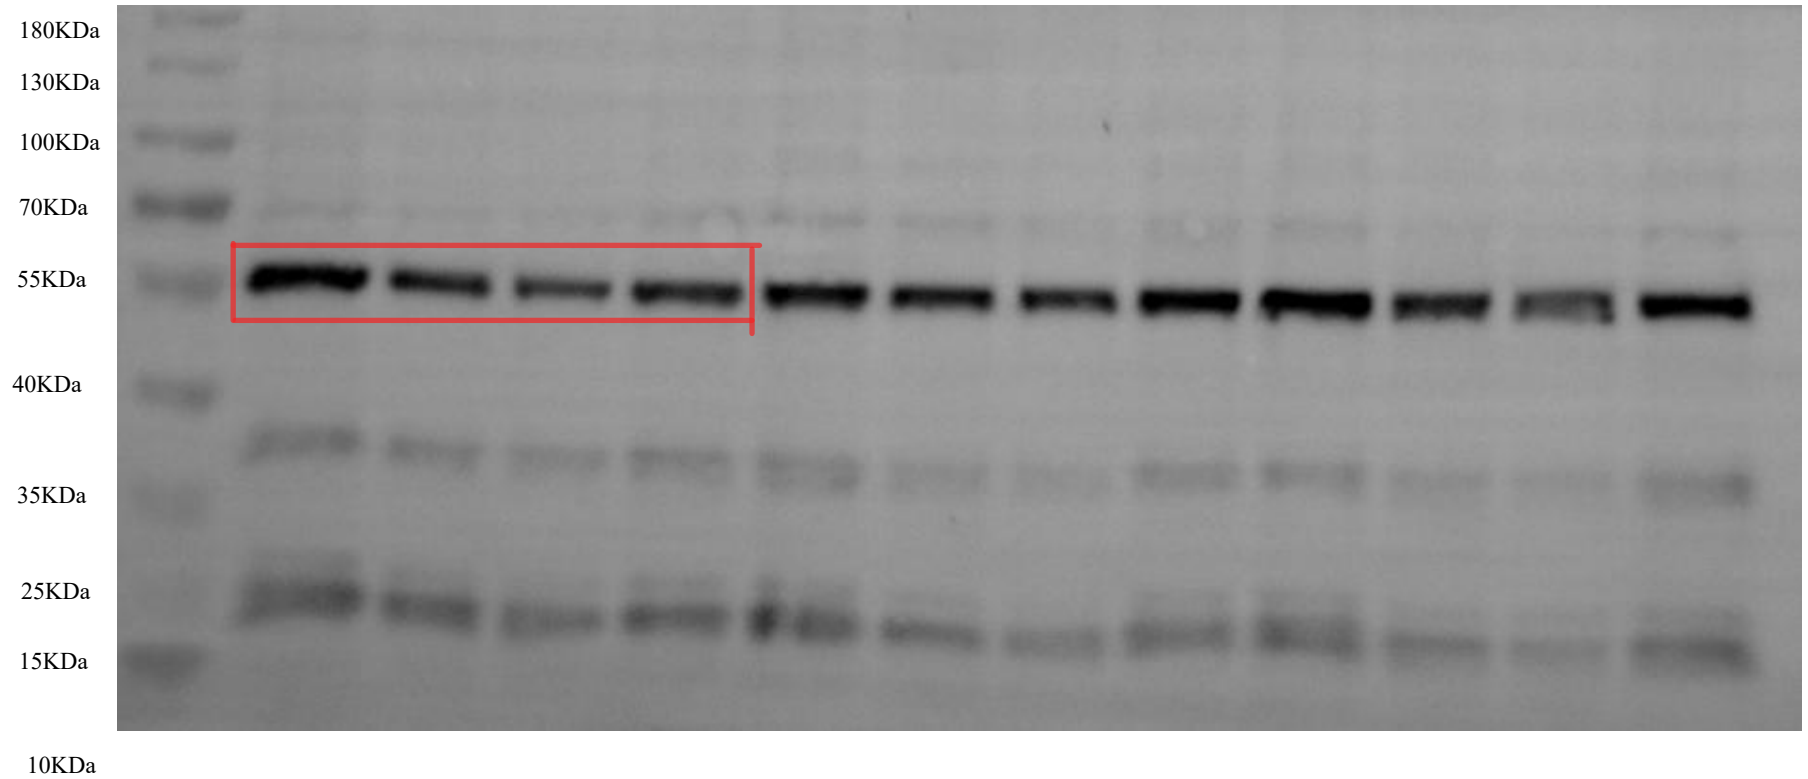

# LC3B

180KDa  
130KDa  
100KDa  
70KDa  
55KDa  
40KDa  
35KDa  
25KDa  
15KDa  
10KDa

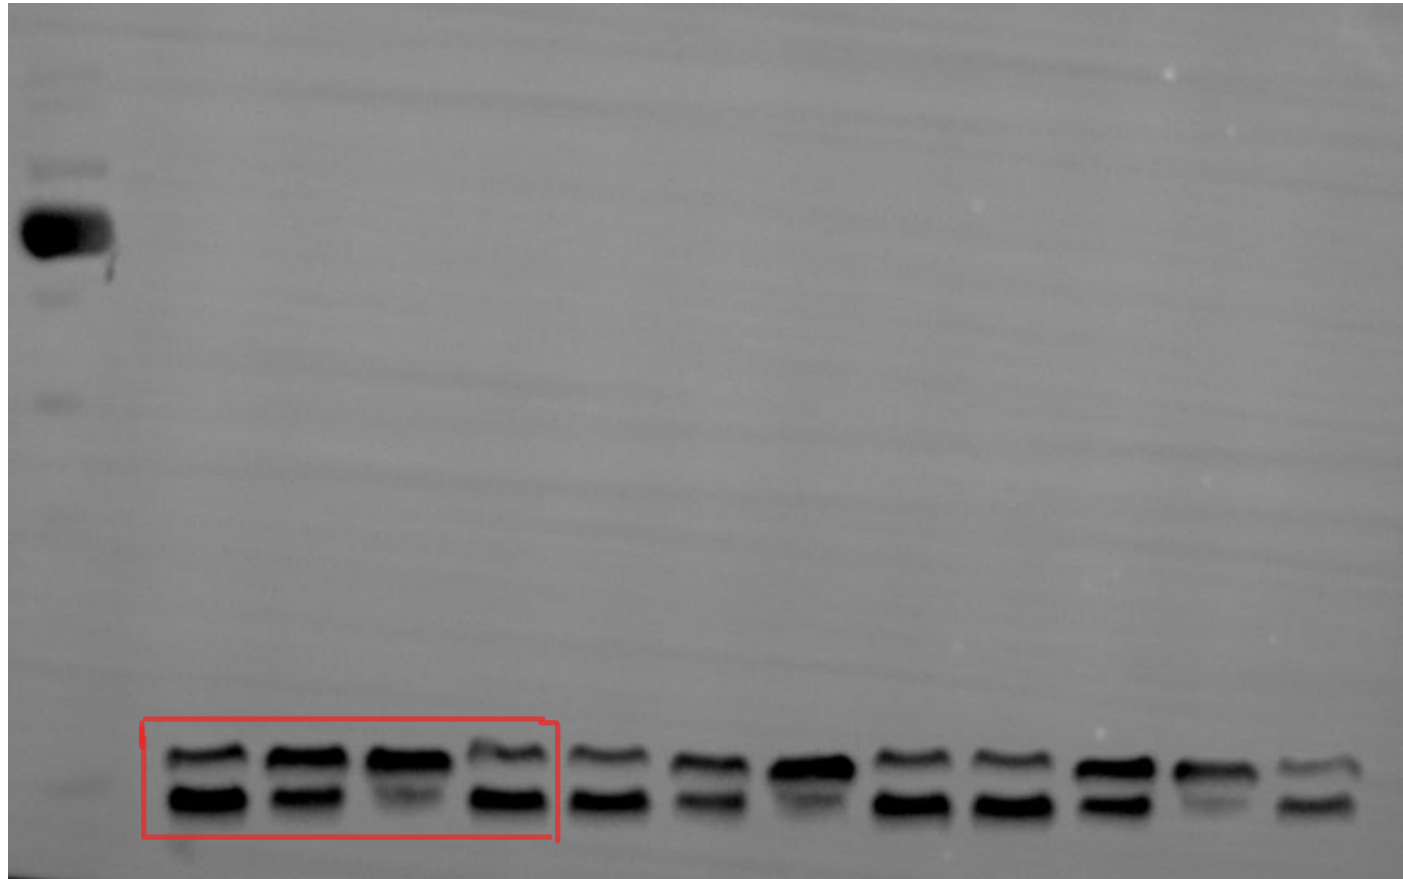

p-p65

180KDa  
130KDa  
100KDa  
70KDa  
55KDa  
40KDa  
35KDa  
25KDa  
15KDa  
10KDa

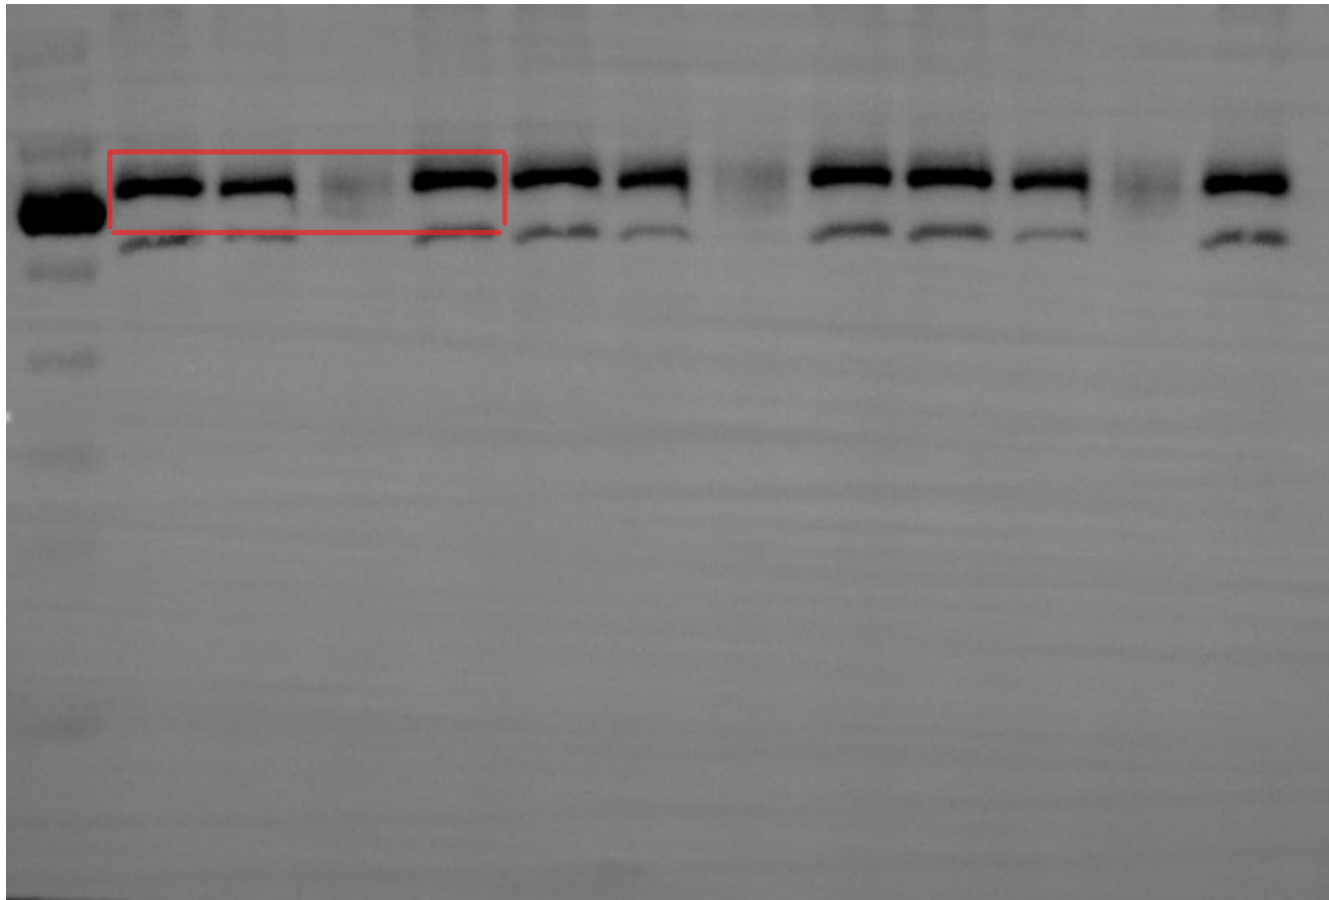

p65

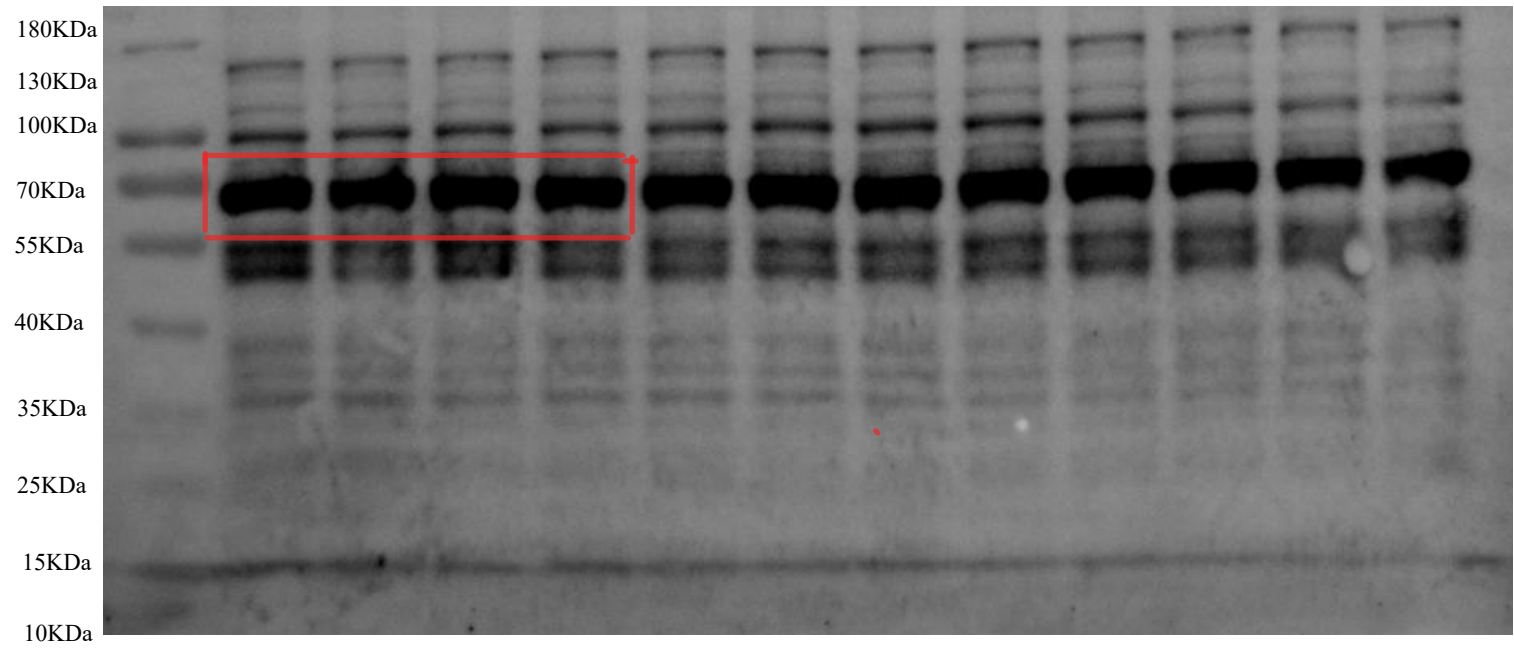



p-I $\kappa$ B $\alpha$

180KDa  
130KDa  
100KDa  
70KDa  
55KDa  
40KDa  
35KDa  
25KDa  
15KDa  
10KDa

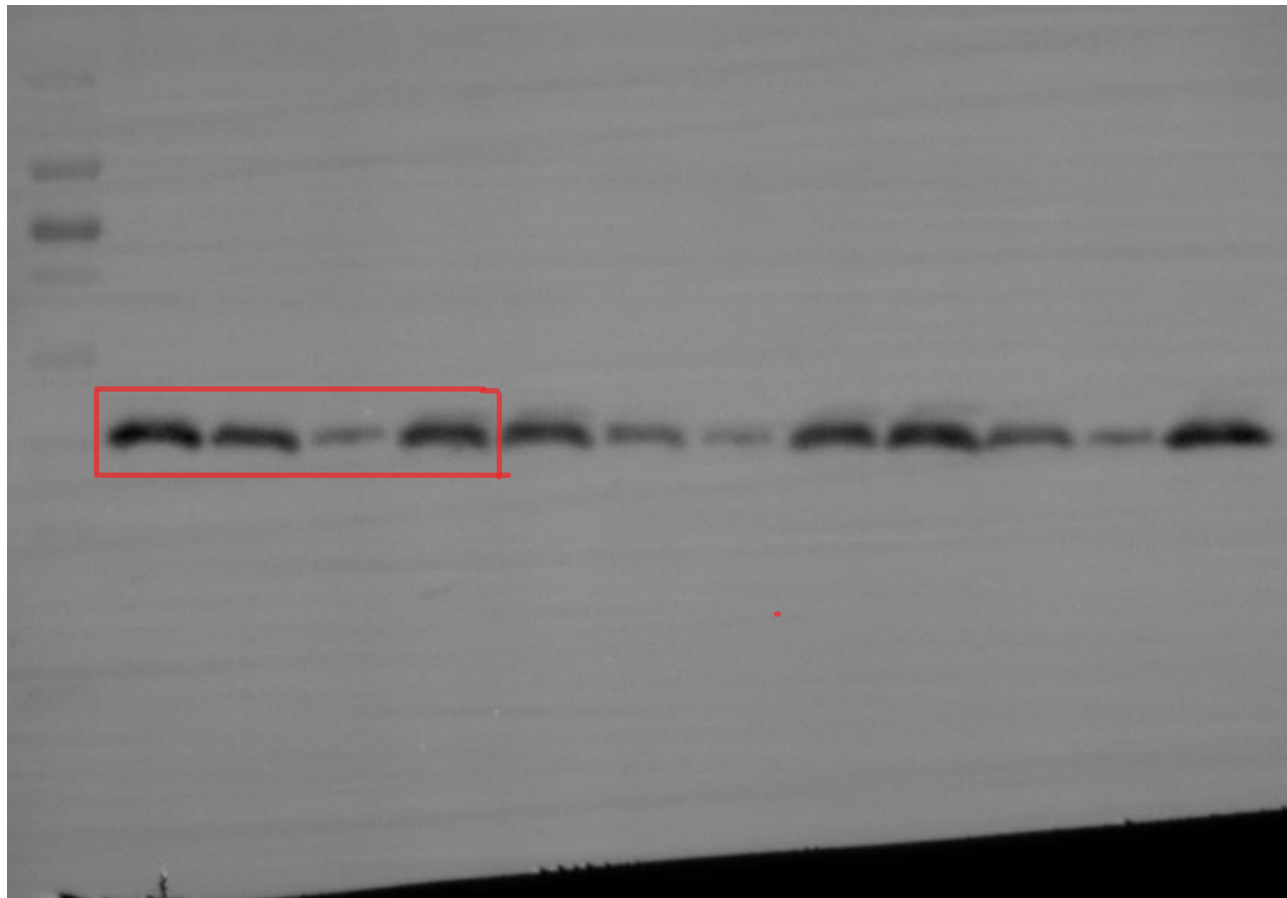

I $\kappa$ B $\alpha$

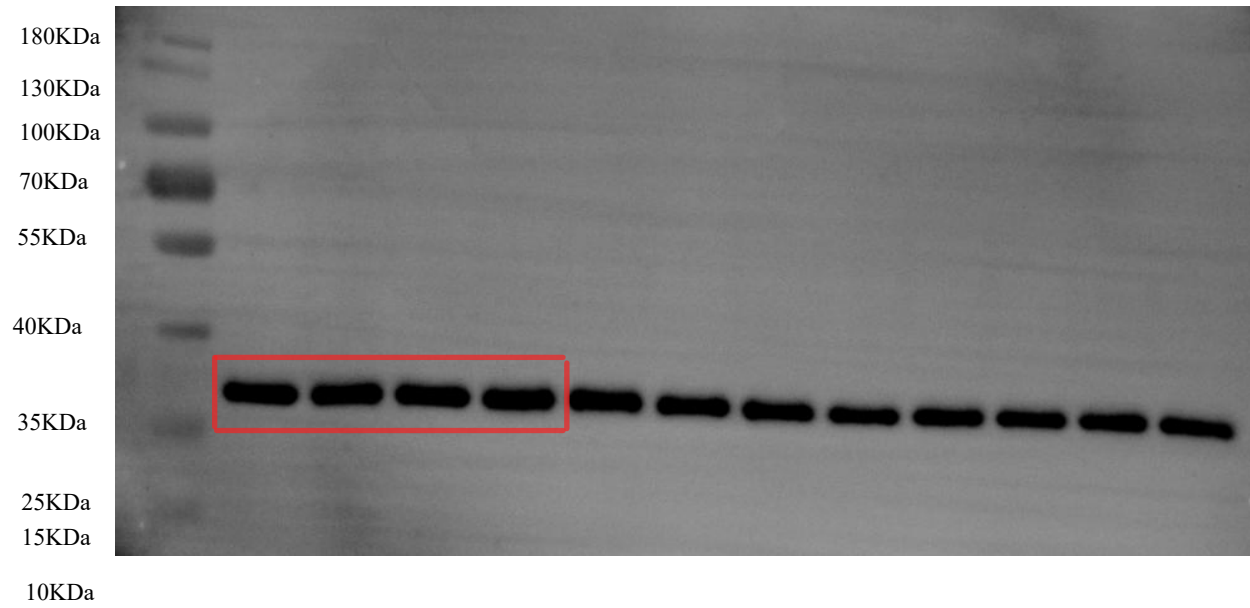

## B3GNT3

180KDa  
130KDa  
100KDa  
70KDa  
55KDa  
40KDa  
35KDa  
25KDa  
15KDa  
10KDa

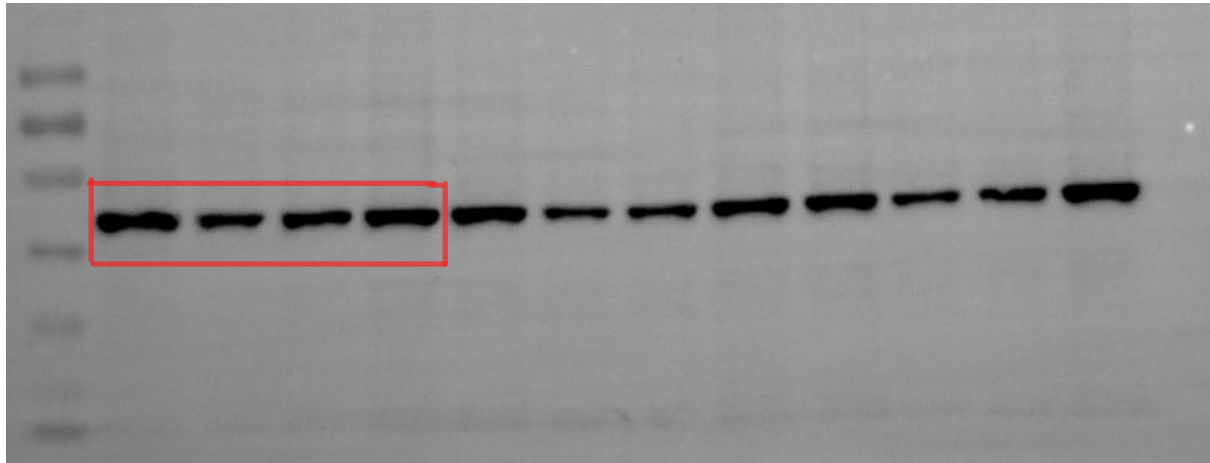

# GAPDH

180KDa  
130KDa  
100KDa  
70KDa  
55KDa  
40KDa  
35KDa  
25KDa  
15KDa  
10KDa

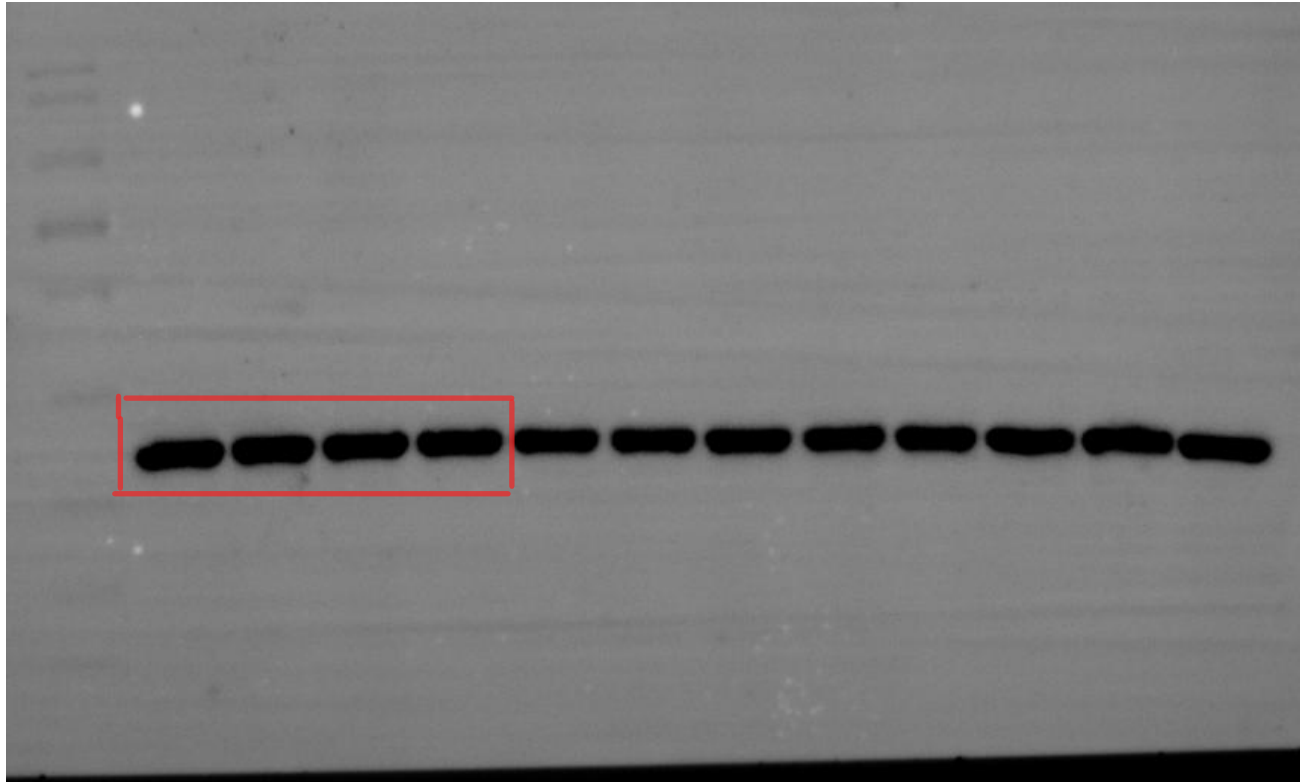

fig 5D WB

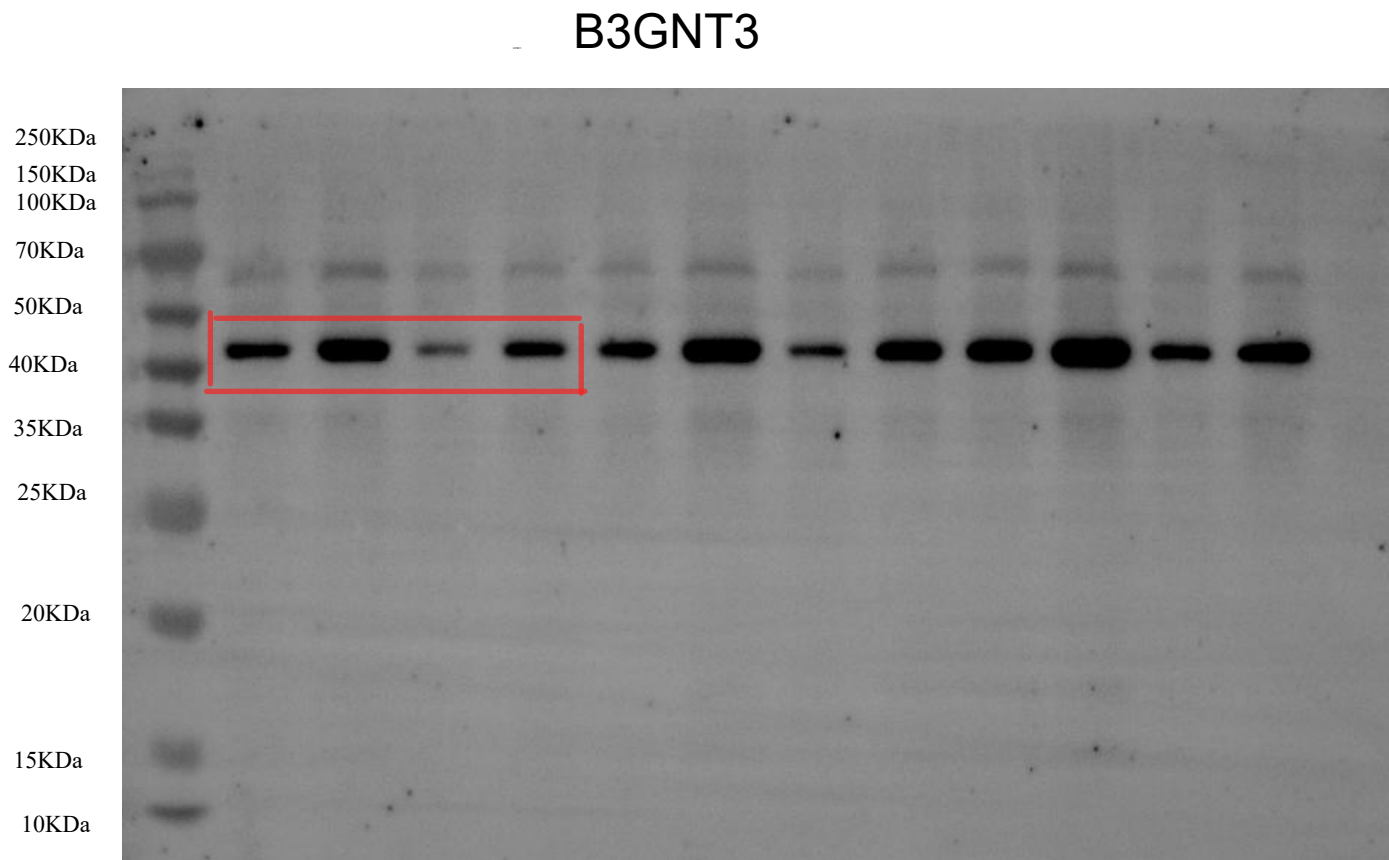

P62

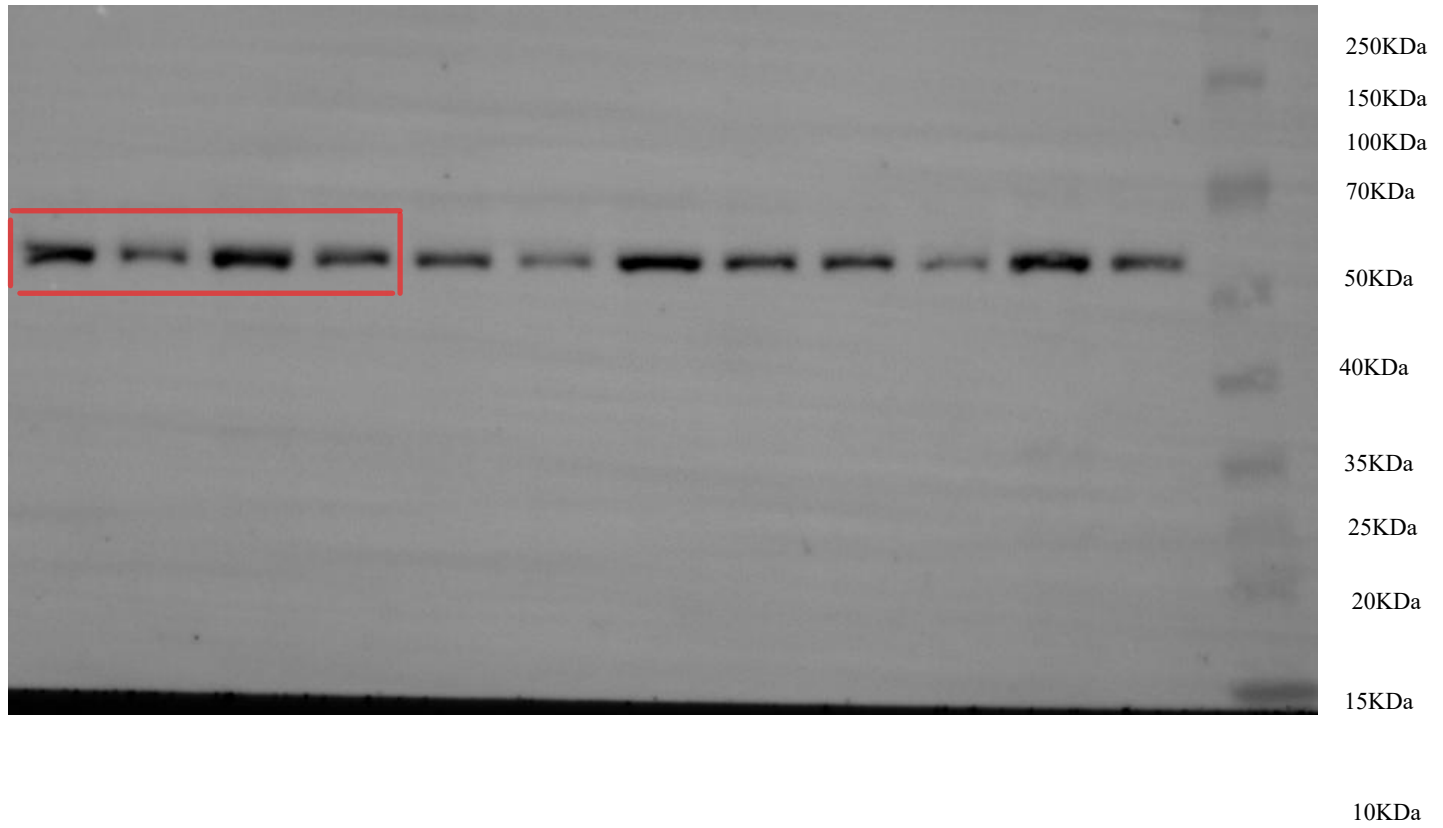

## Beclin1

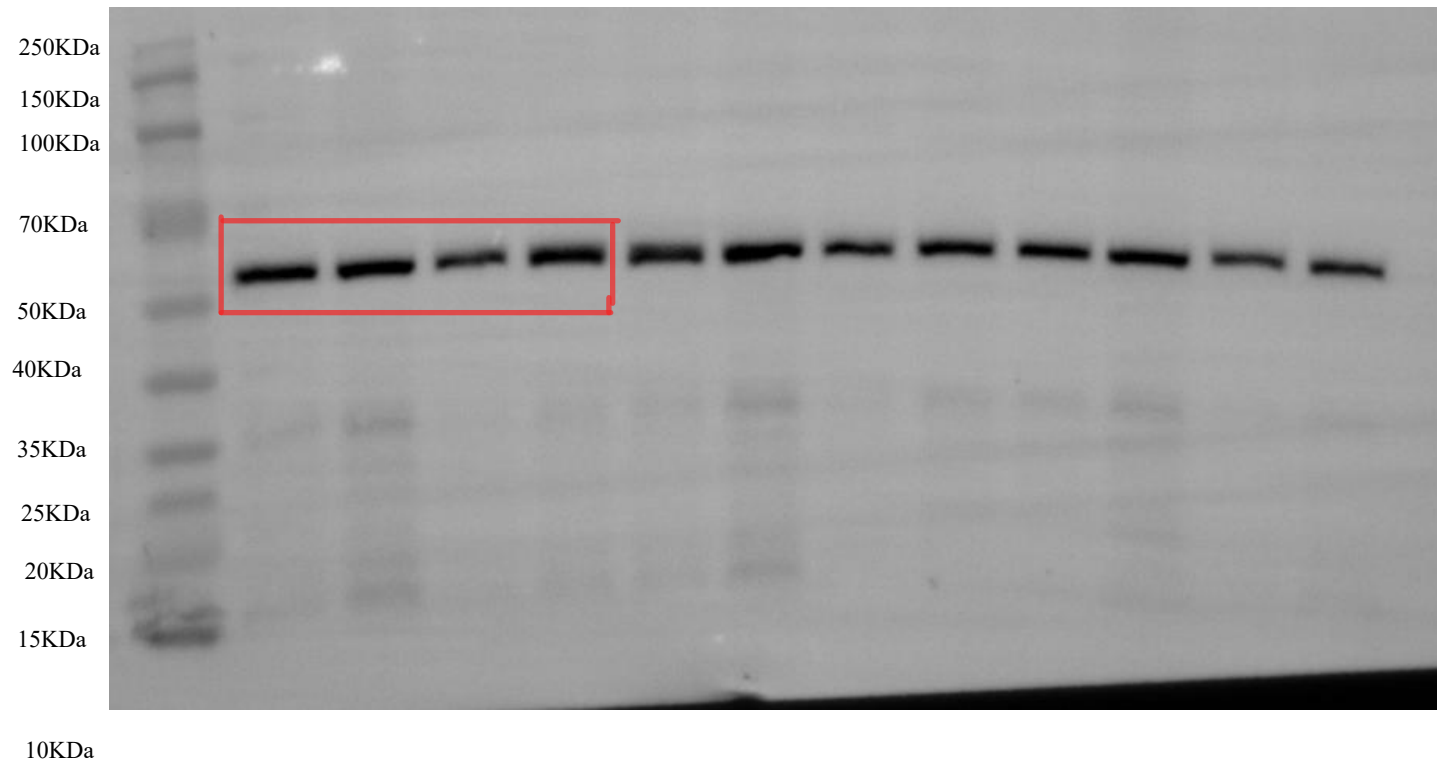

## LC3B

250KDa  
150KDa  
100KDa  
70KDa  
50KDa  
40KDa  
35KDa  
25KDa  
20KDa  
15KDa  
10KDa

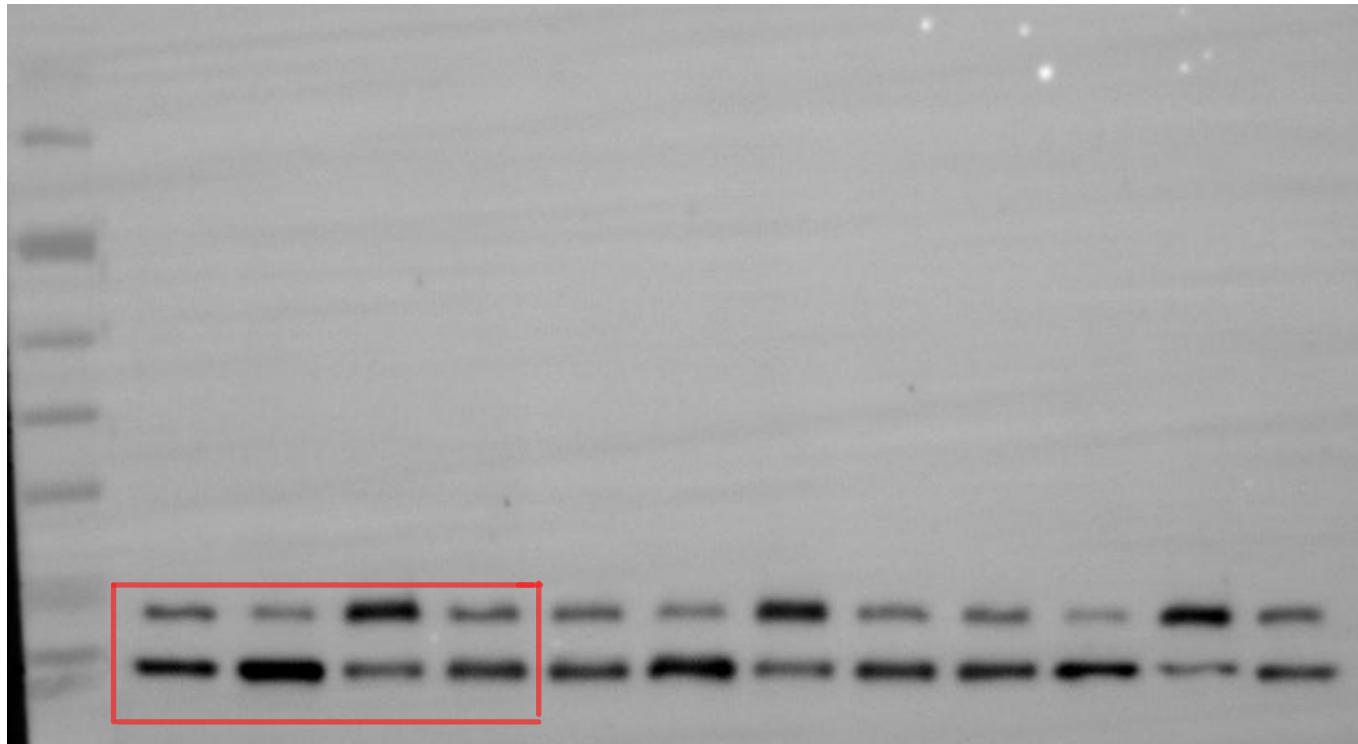



# GAPDH

250KDa  
150KDa  
100KDa  
70KDa  
50KDa  
40KDa  
35KDa  
25KDa  
20KDa  
15KDa  
10KDa

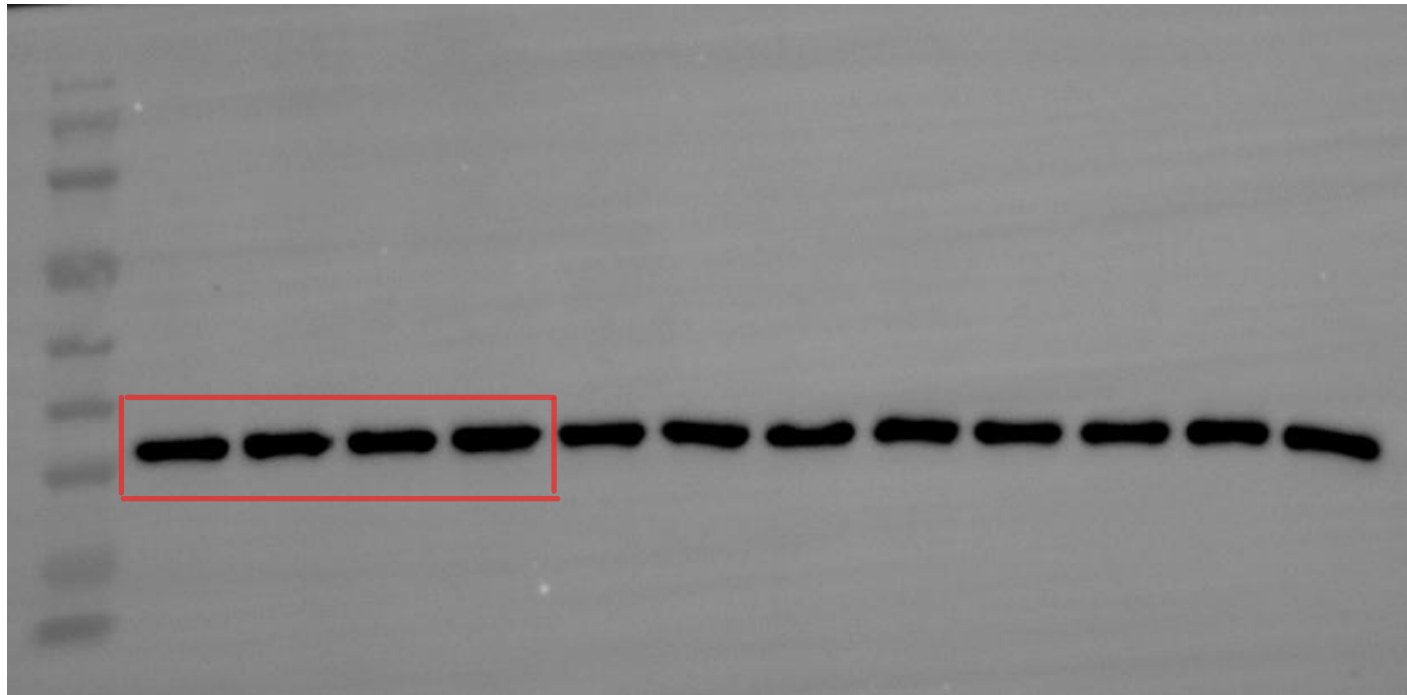

**FUT3**

180KDa  
130KDa  
100KDa  
70KDa  
55KDa  
40KDa  
35KDa  
25KDa  
15KDa  
10KDa

# FUT3

P62

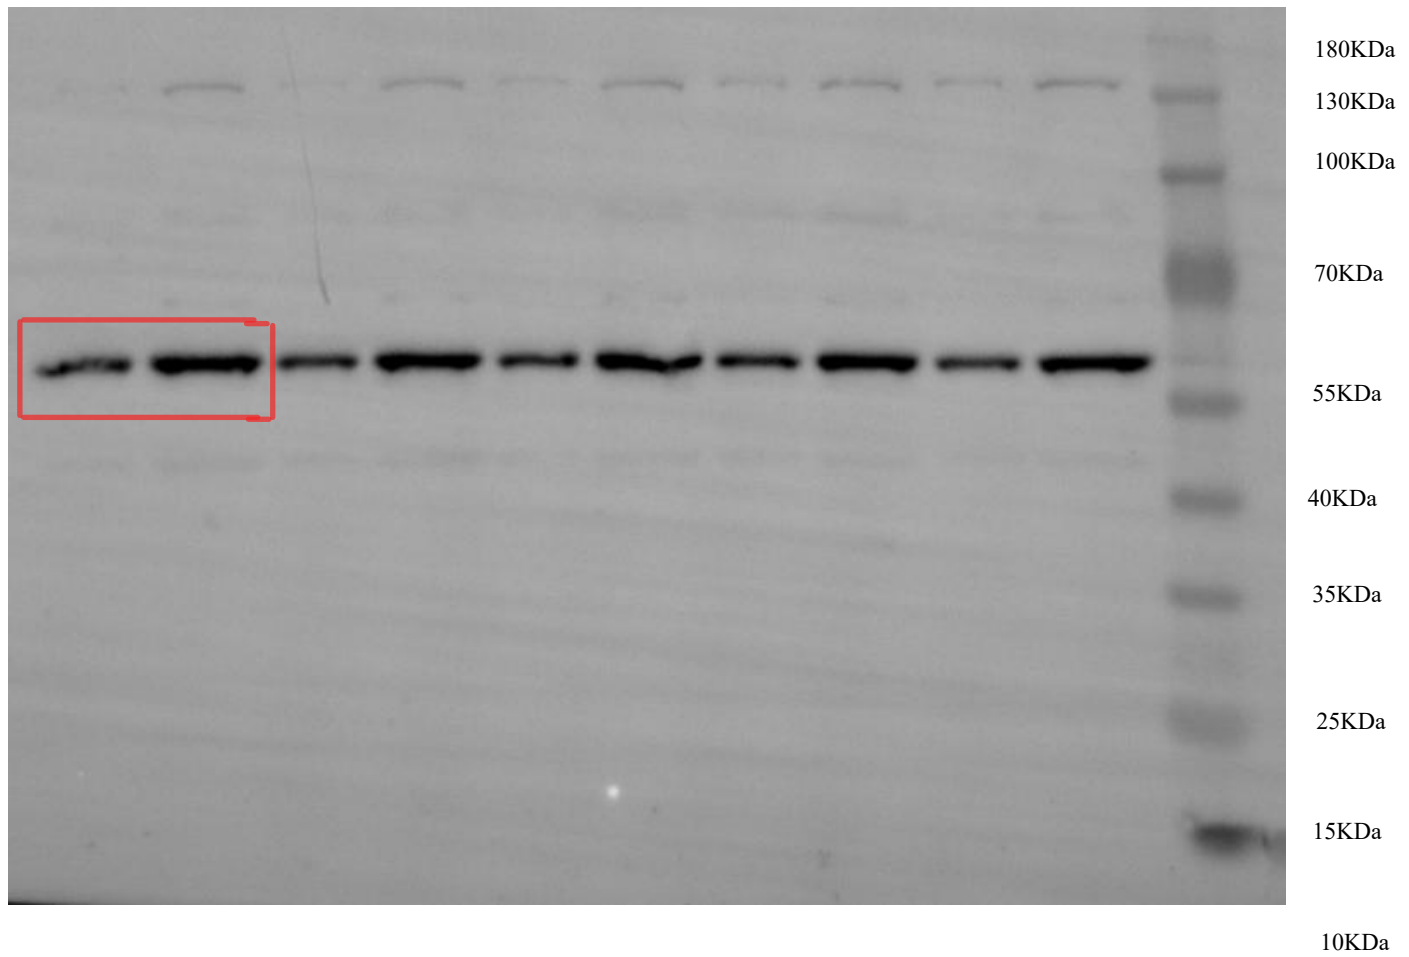

## Beclin1

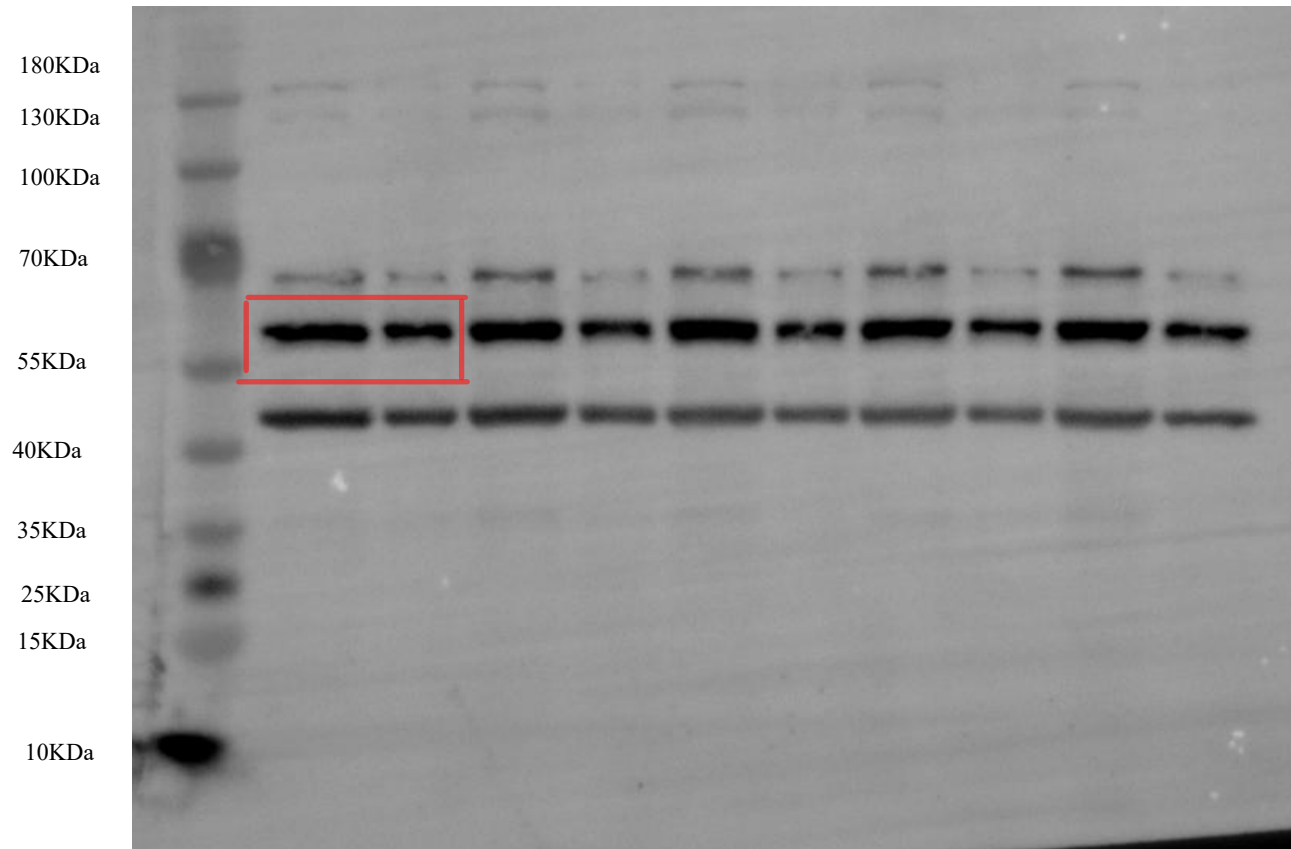

LC3B

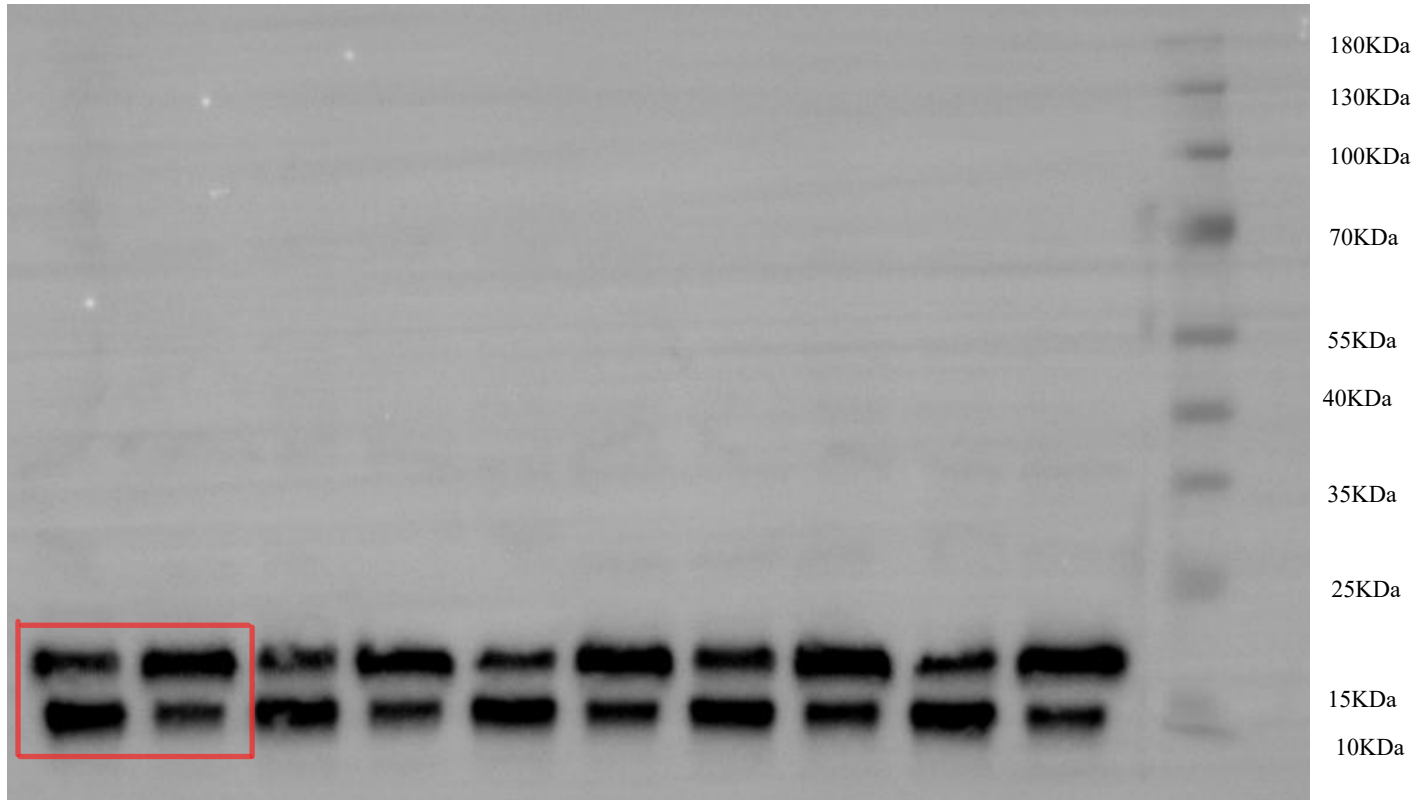

p-p65

180KDa  
130KDa  
100KDa  
70KDa  
55KDa  
40KDa  
35KDa  
25KDa  
15KDa  
10KDa

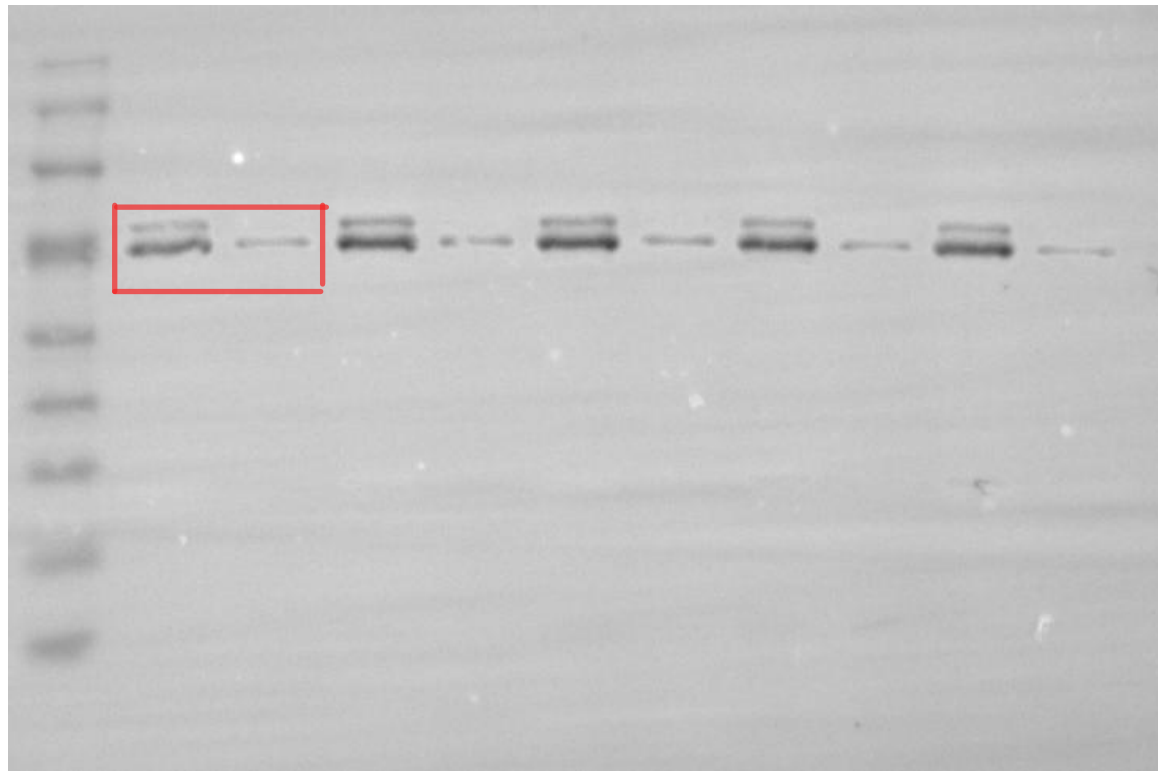

p65

180KDa  
130KDa  
100KDa  
70KDa  
55KDa  
40KDa  
35KDa  
25KDa  
15KDa  
10KDa

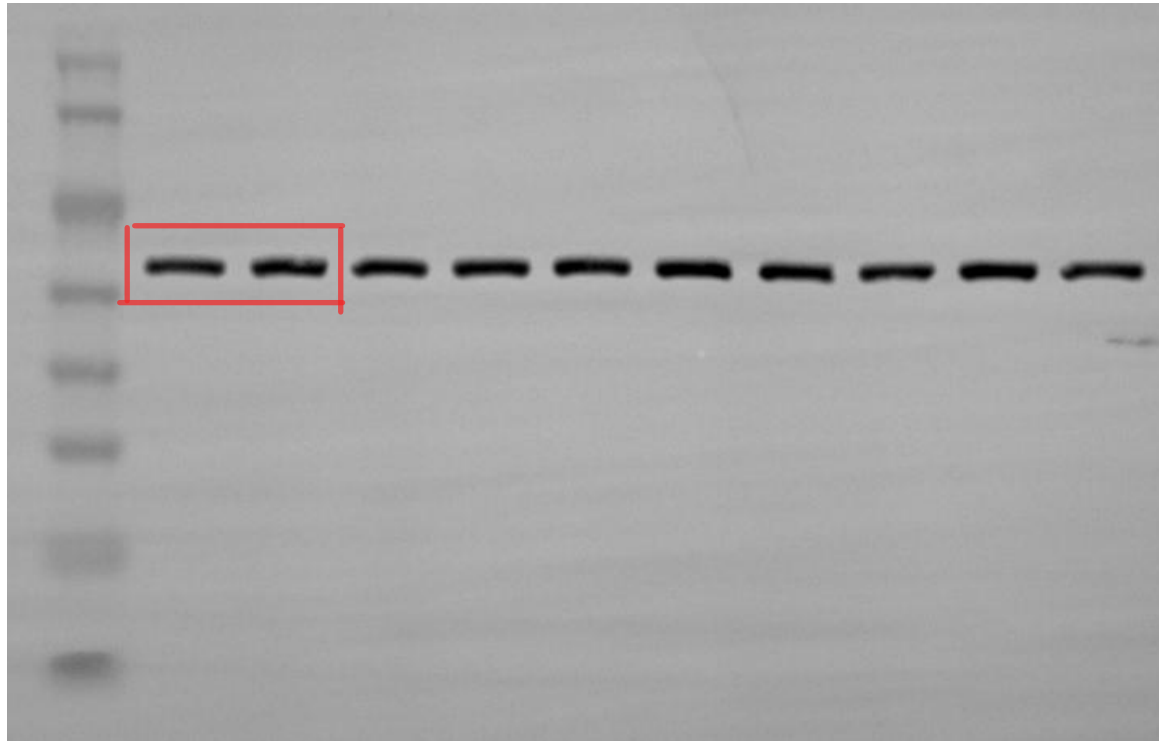

p-I $\kappa$ B $\alpha$

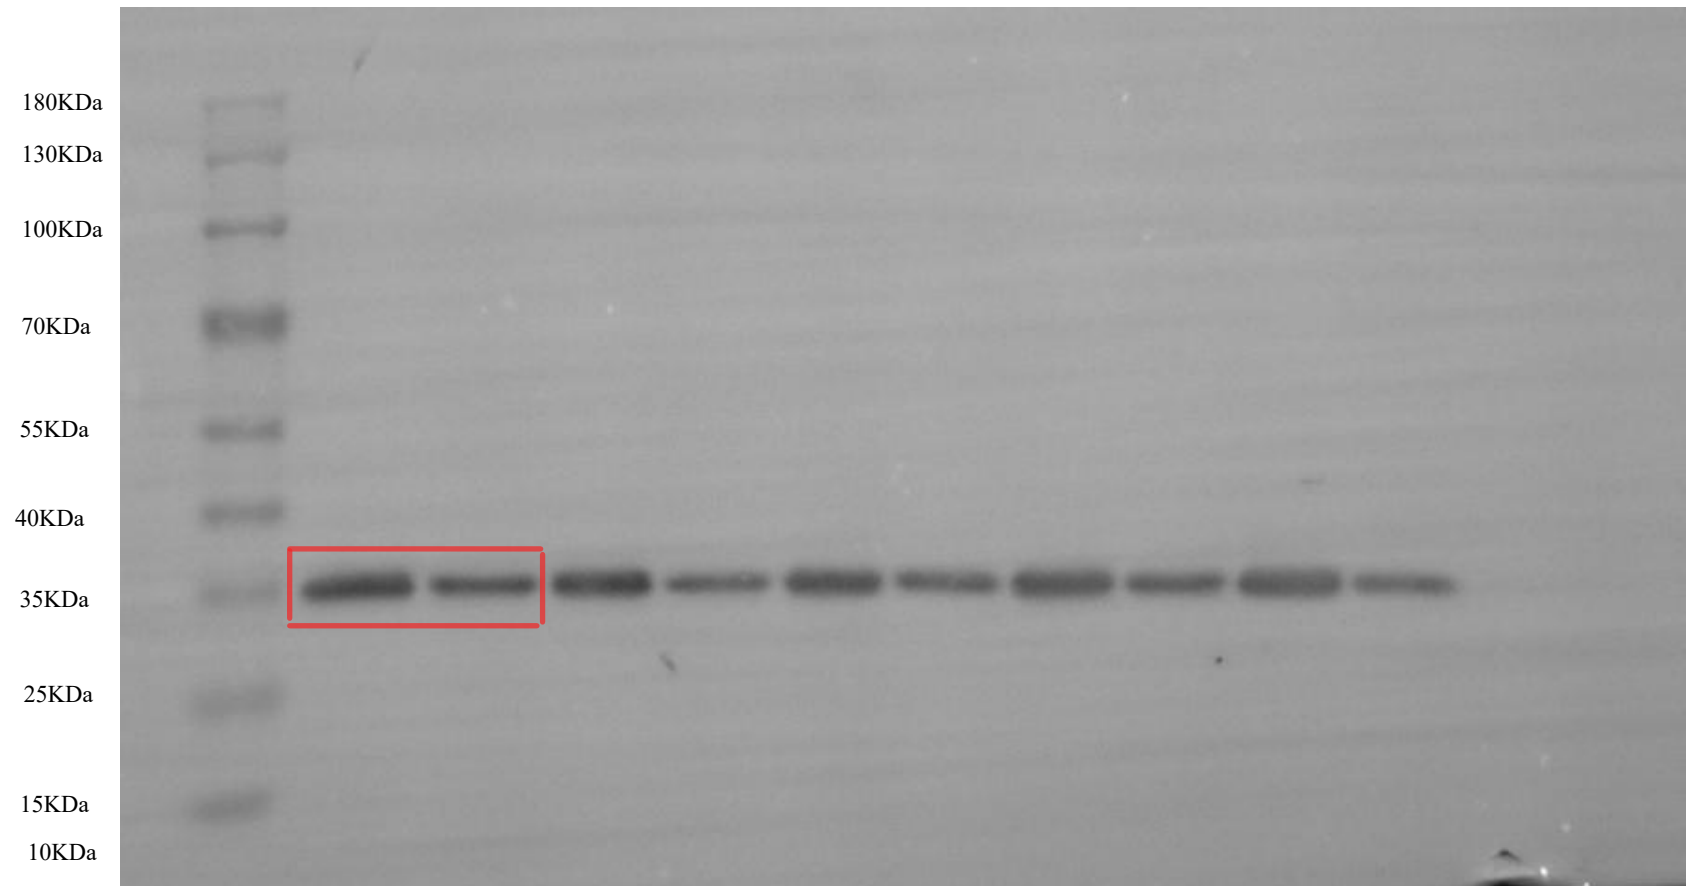



I $\kappa$ B $\alpha$

180KDa  
130KDa  
100KDa  
70KDa  
55KDa  
40KDa  
35KDa  
25KDa  
15KDa  
10KDa

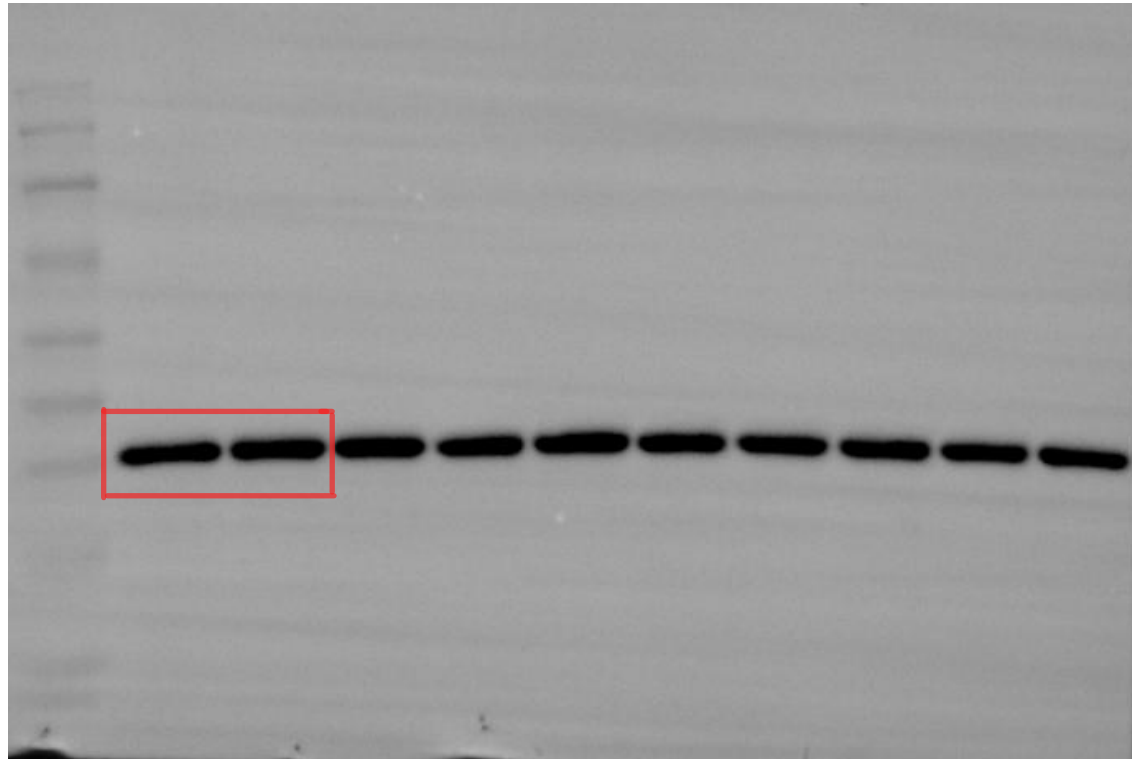

## B3GNT3

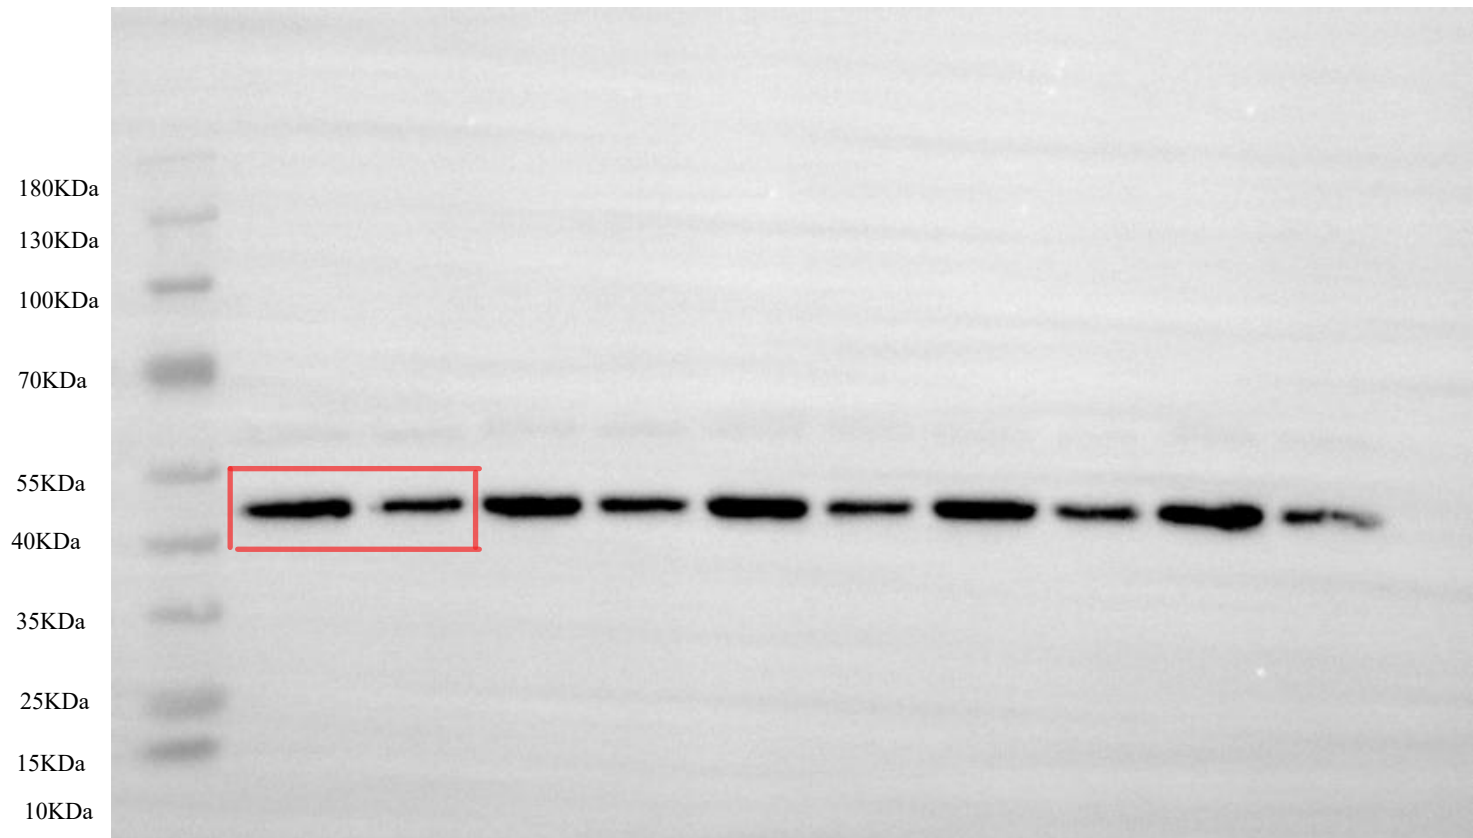

# GAPDH

180KDa  
130KDa  
100KDa  
70KDa  
55KDa  
40KDa  
35KDa  
25KDa  
15KDa  
10KDa

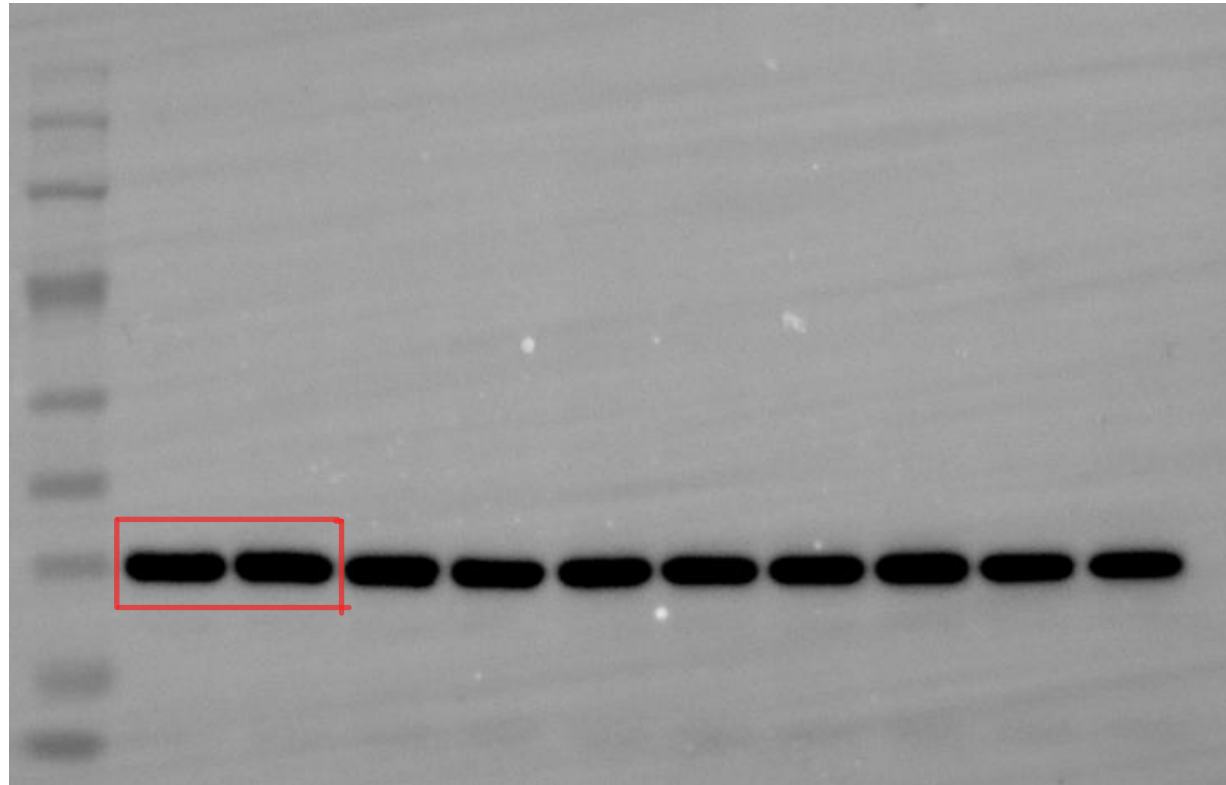

fig 7 B,D WB

si-B3GNT3

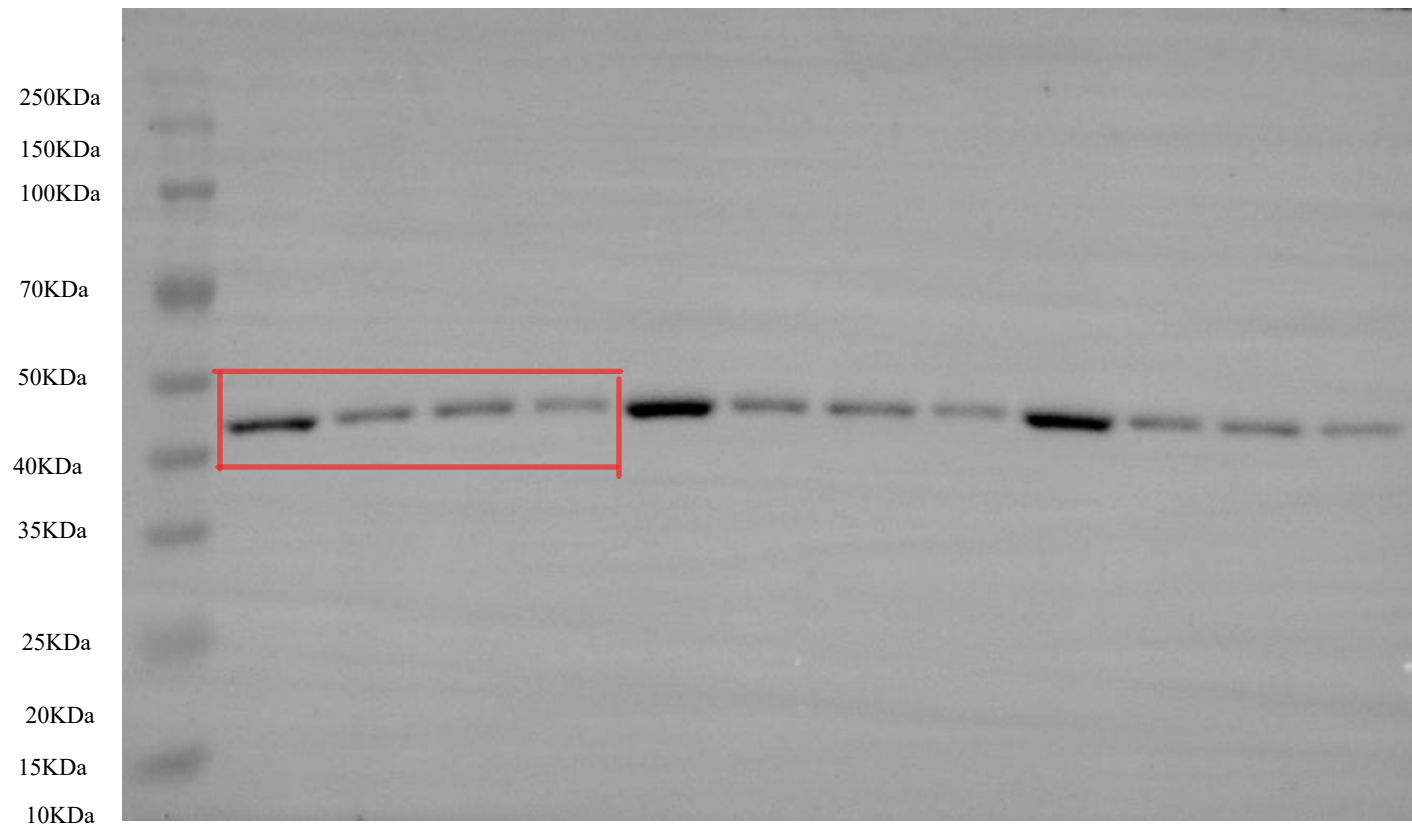

# GAPDH

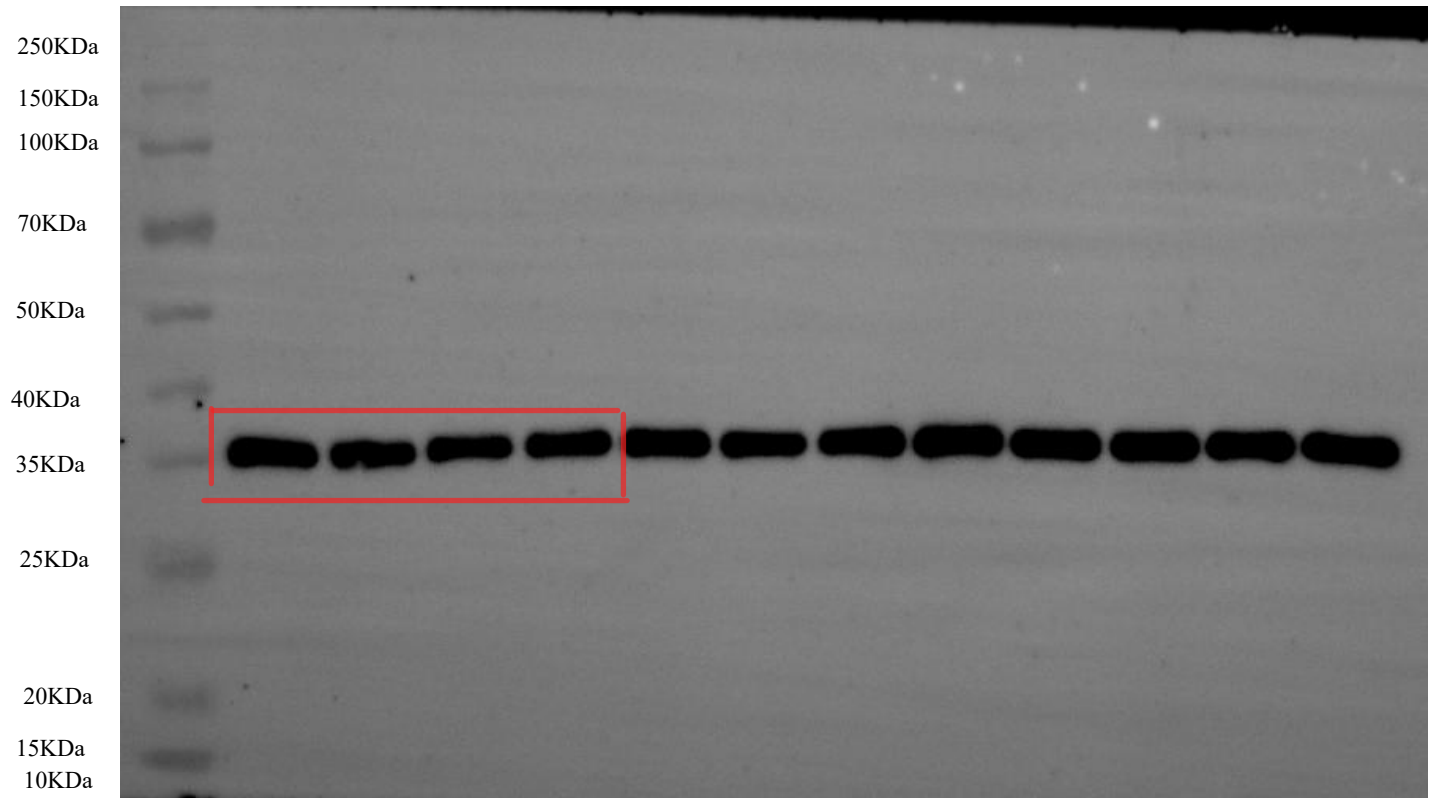

## oe-B3GNT3

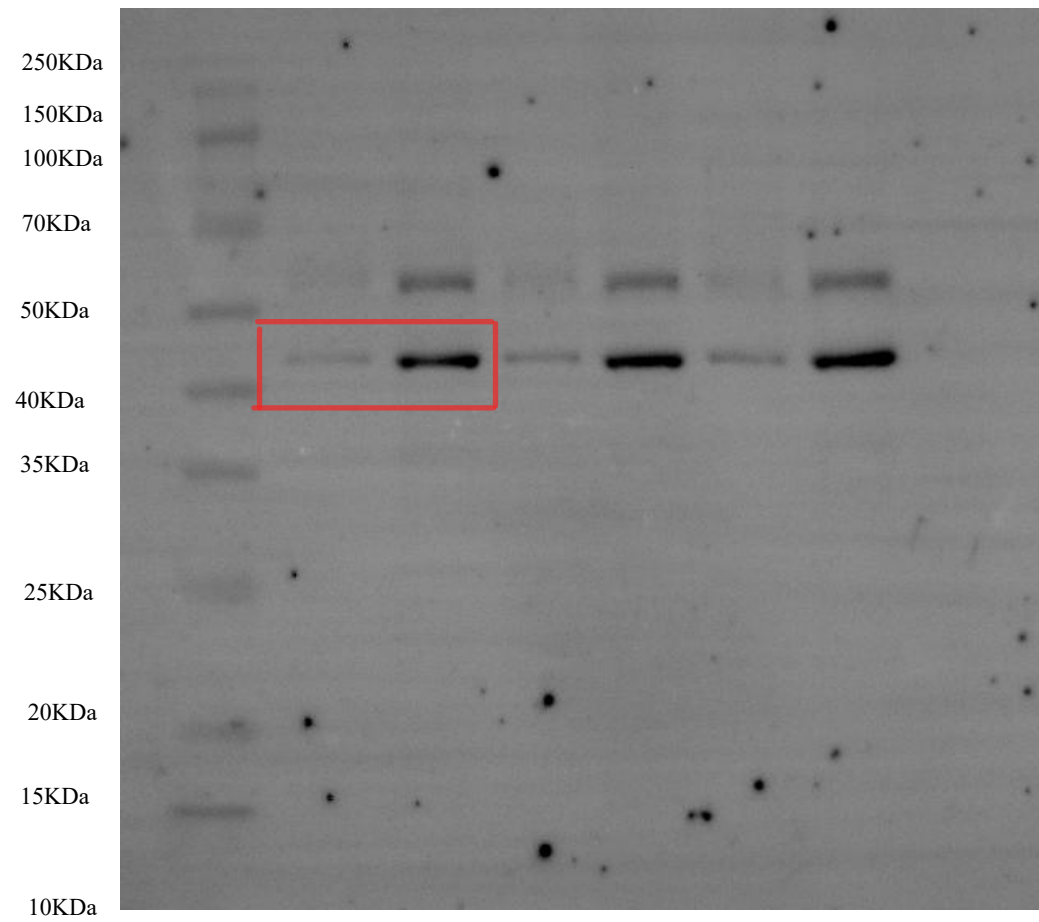

# GAPDH

250KDa  
150KDa  
100KDa  
70KDa  
50KDa  
40KDa  
35KDa  
25KDa  
20KDa  
15KDa  
10KDa

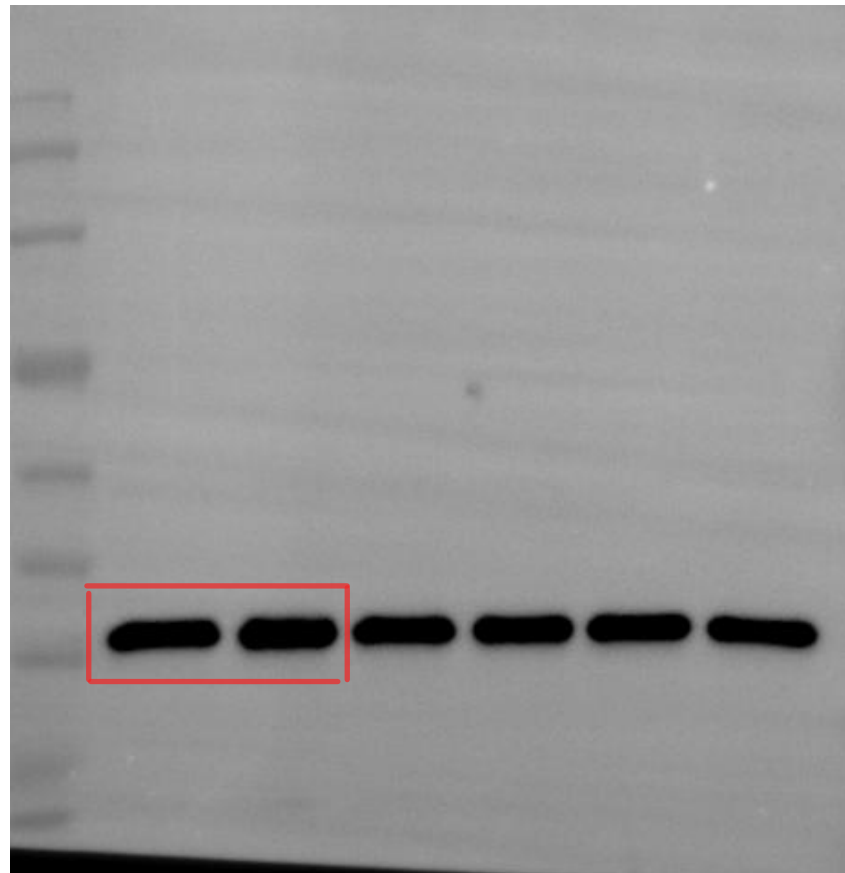

fig 7 I WB

Beclin1

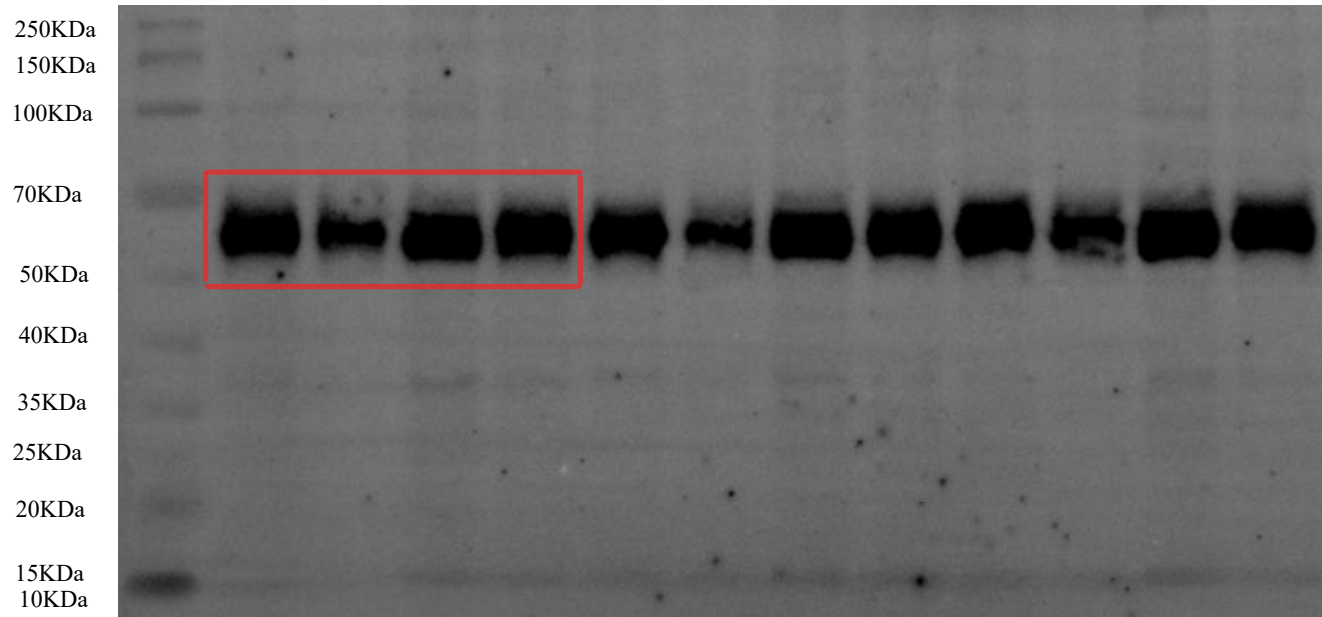



P62

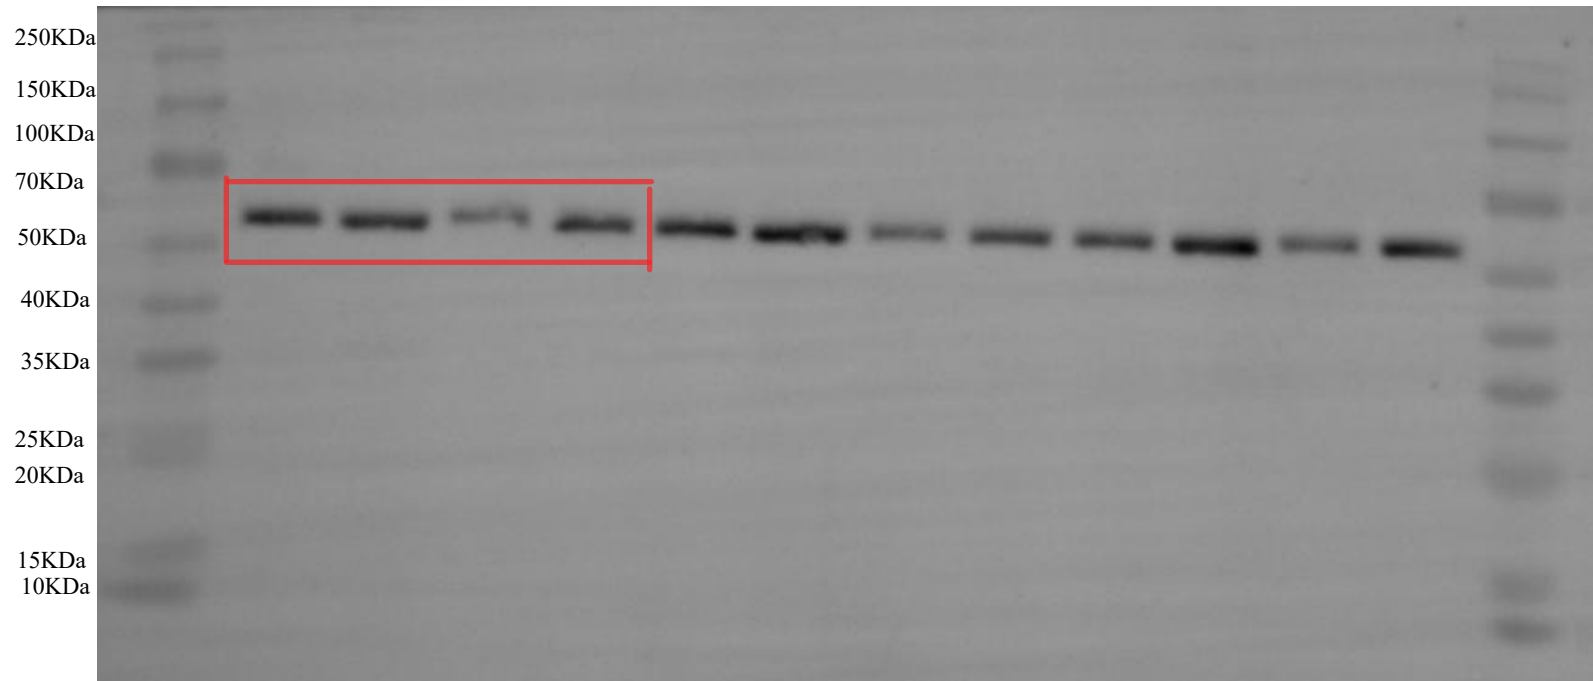

## LC3B

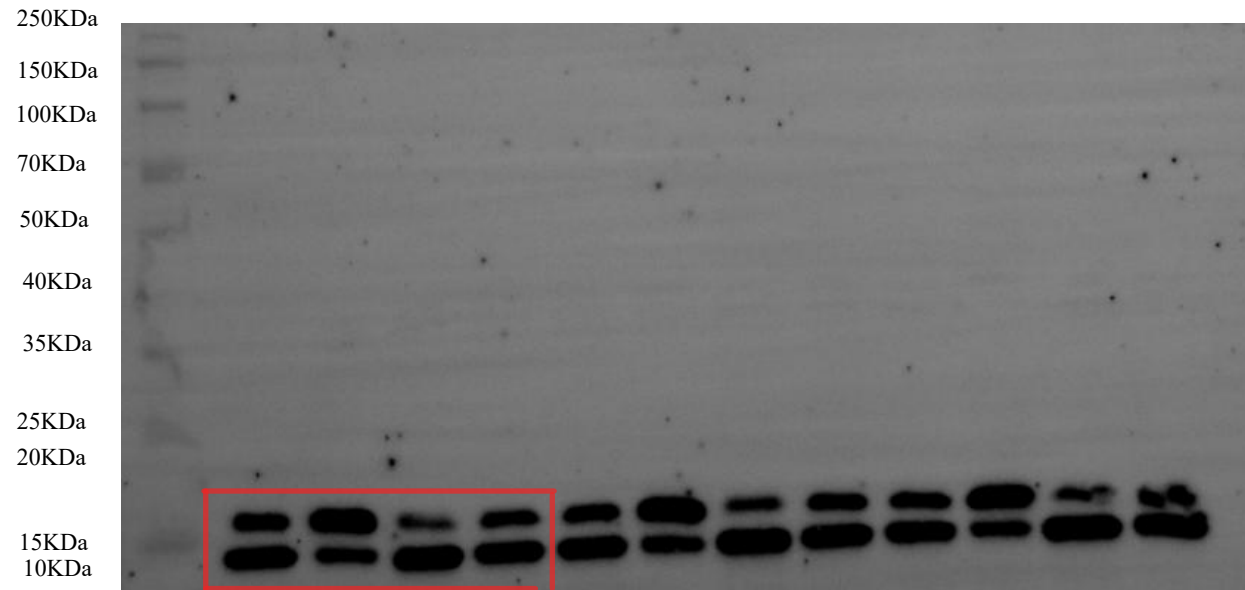

I $\kappa$ B $\alpha$

250KDa  
150KDa  
100KDa  
70KDa  
50KDa  
40KDa  
35KDa  
25KDa  
20KDa  
15KDa  
10KDa

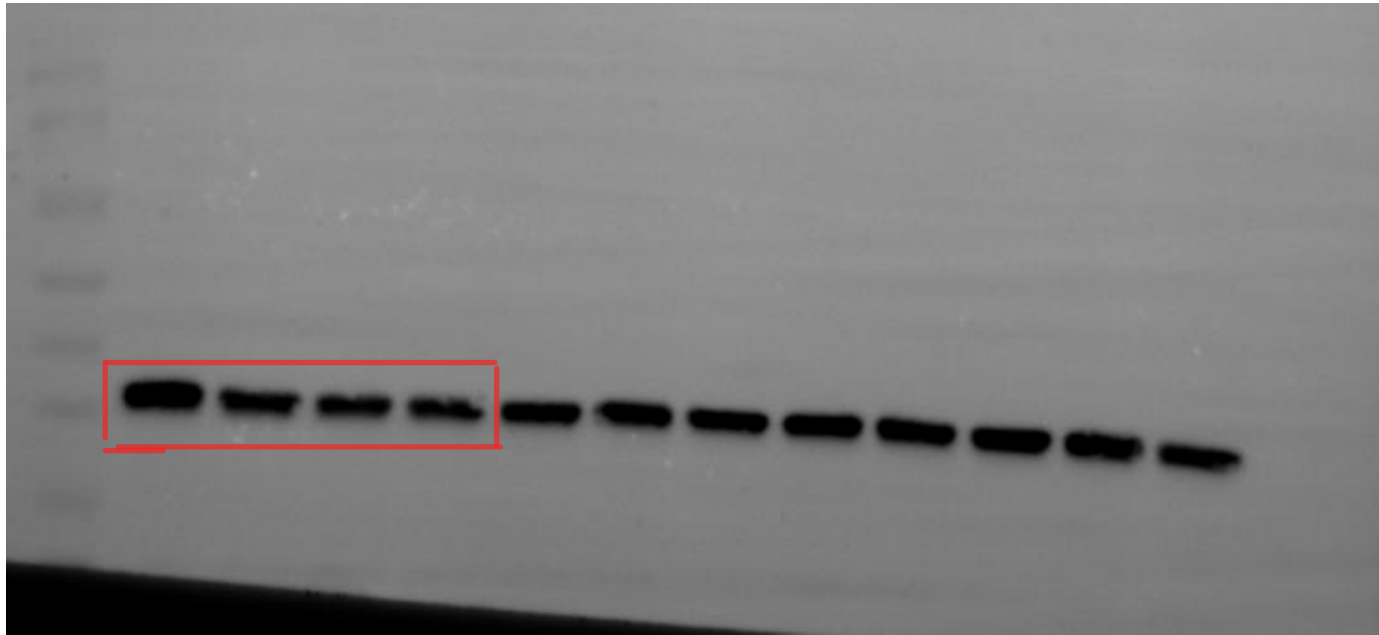

p-I $\kappa$ B $\alpha$

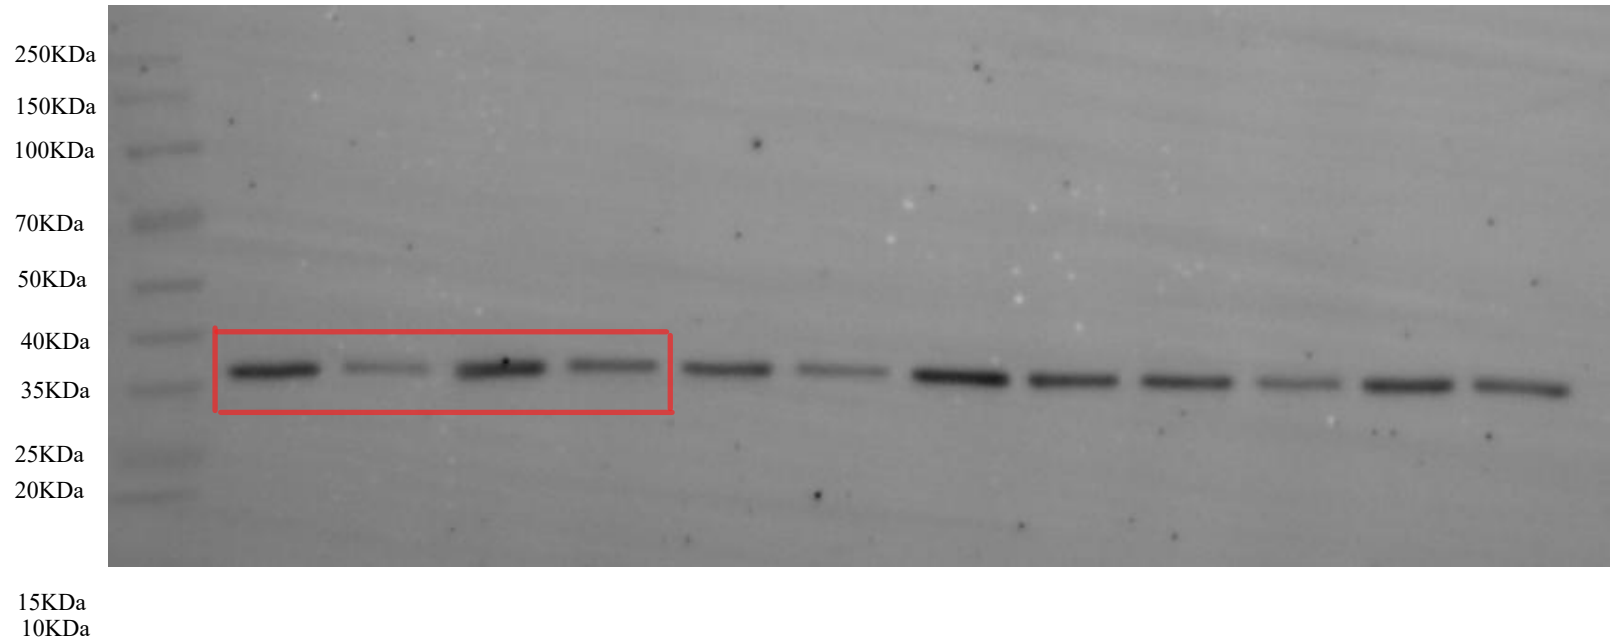

p65

250KDa  
150KDa  
100KDa  
70KDa  
50KDa  
40KDa  
35KDa  
25KDa  
20KDa  
15KDa  
10KDa

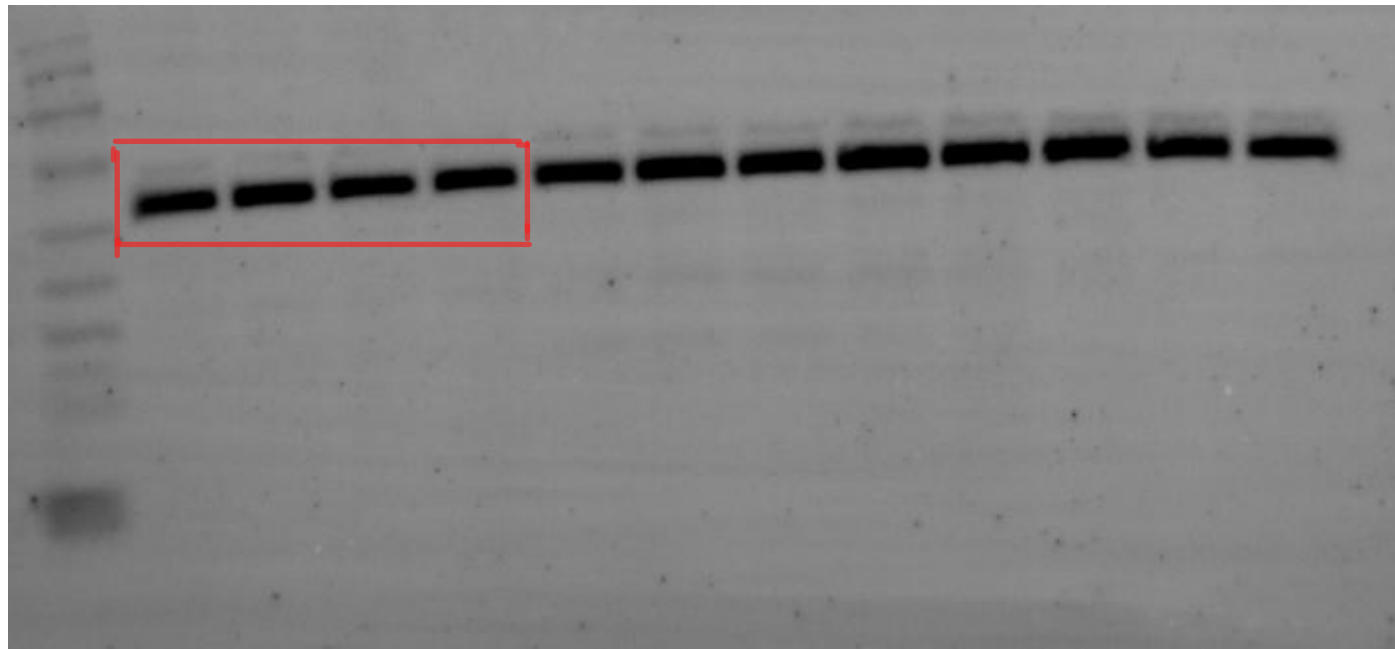

p-p65

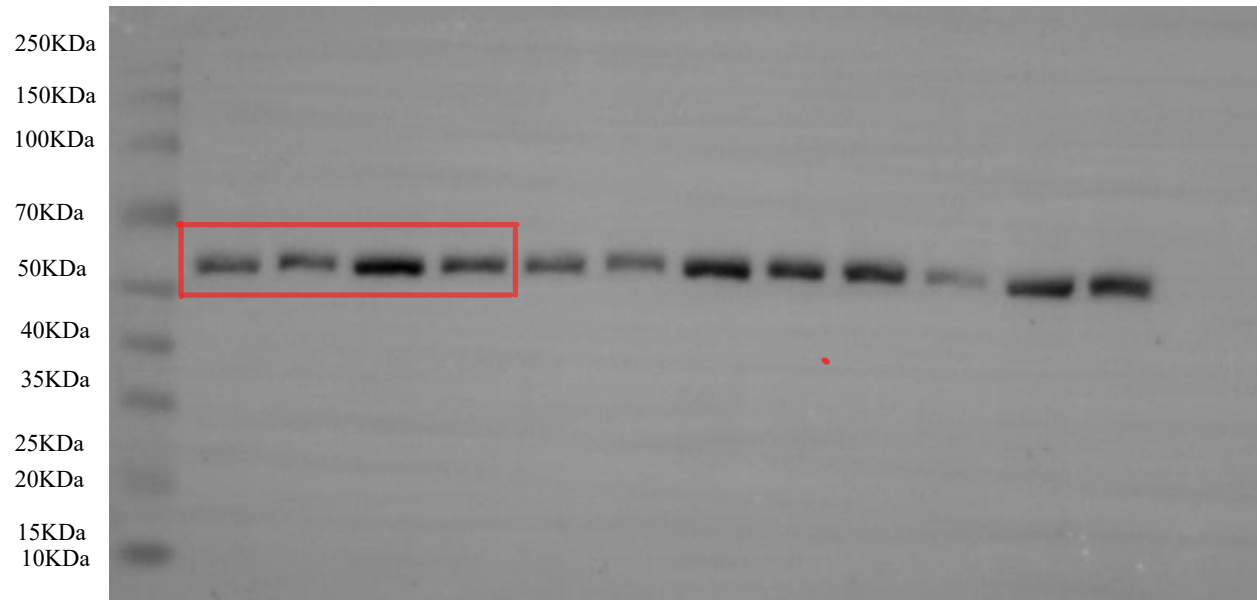

# GAPDH

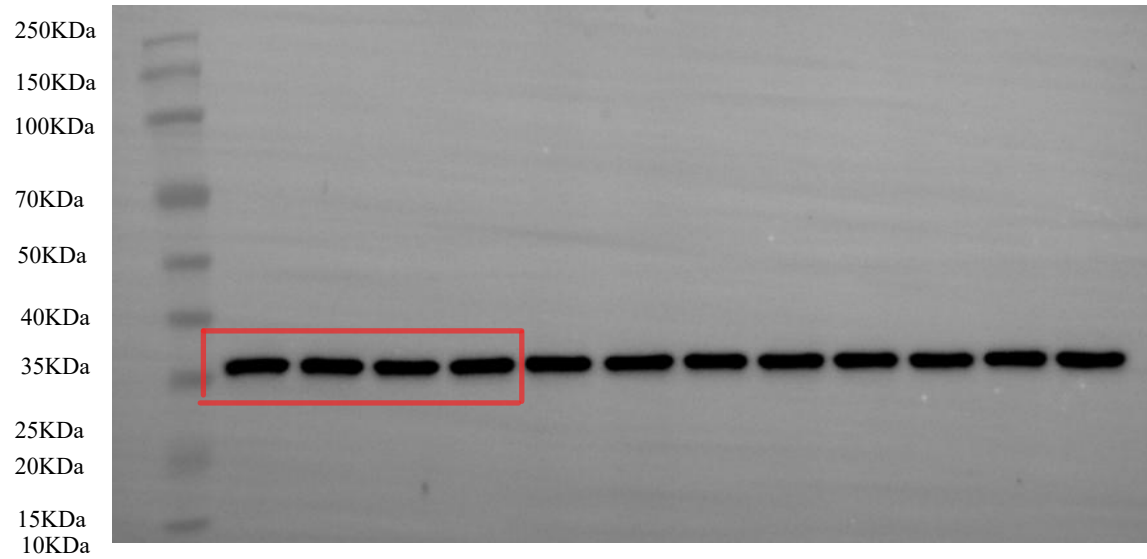

Supplement: Supplementary file 1 [file 2ecb250f929aa29f0ab15e56.pdf]
